# Supplementary material for: Effect of the cyano group on colour-tunability of aryl-substituted buta-1,3-diene based solid-state emissive copolymers
Source: Royal Society of Chemistry journal article supplement (doi:10.1039/d3tc02999a), 2023-01-01
Supplement: d3tc02999a1.pdf [file d3tc02999a1.pdf]

## Supplementary Information

### Effect of Cyano group in Colour-tunability of Aryl-substituted Buta-1,3-Diene based Solid-state Emissive Copolymers

Prasanta Pal,<sup>a</sup> Ayan Datta,<sup>a</sup> Susmita Mukherjee,<sup>b</sup> Ajay Perumal<sup>\*b</sup> and Sudip Malik<sup>a\*</sup>

<sup>a</sup> School of Applied & Interdisciplinary Sciences (SAIS), Indian Association for the Cultivation of Science, 2A and 2B Raja S. C. Mullick Road, Jadavpur, Kolkata-700032, E-mail: psusm2@iacs.res.in

<sup>b</sup> Functional NANO and Opto-electronics Lab (FNOL), Department of Physical Sciences, Indian Institute of Science Education and Research (IISER), Berhampur, Odisha, India-760010, E-mail ajay@iiserbpr.ac.in

| <b>Table of Content:</b>                                                                | <b>Page No.</b> |
|-----------------------------------------------------------------------------------------|-----------------|
| <b>1. <sup>1</sup>H NMR, <sup>13</sup>C NMR and MALDI-TOF of intermediate molecules</b> | <b>2-11</b>     |
| <b>2. <sup>1</sup>H NMR and <sup>13</sup>C NMR of polymers</b>                          | <b>12-13</b>    |
| <b>3. MALDI-TOF mass of polymers</b>                                                    | <b>15-16</b>    |
| <b>4. TGA and DSC of polymers</b>                                                       | <b>16-17</b>    |
| <b>5. Solvent dependent UV and PL</b>                                                   | <b>17-18</b>    |
| <b>6. AIE property of P2 and CIE coordinates</b>                                        | <b>19</b>       |
| <b>7. Lippert-Mataga plot and stokes shift values</b>                                   | <b>20-21</b>    |
| <b>8. TCSPC data</b>                                                                    | <b>22</b>       |
| <b>9. Optimized geometries</b>                                                          | <b>23</b>       |
| <b>10. Comparative device results and I-V characteristics</b>                           | <b>24-25</b>    |
| <b>11. Literature on non-doped PLEDs device</b>                                         | <b>26</b>       |

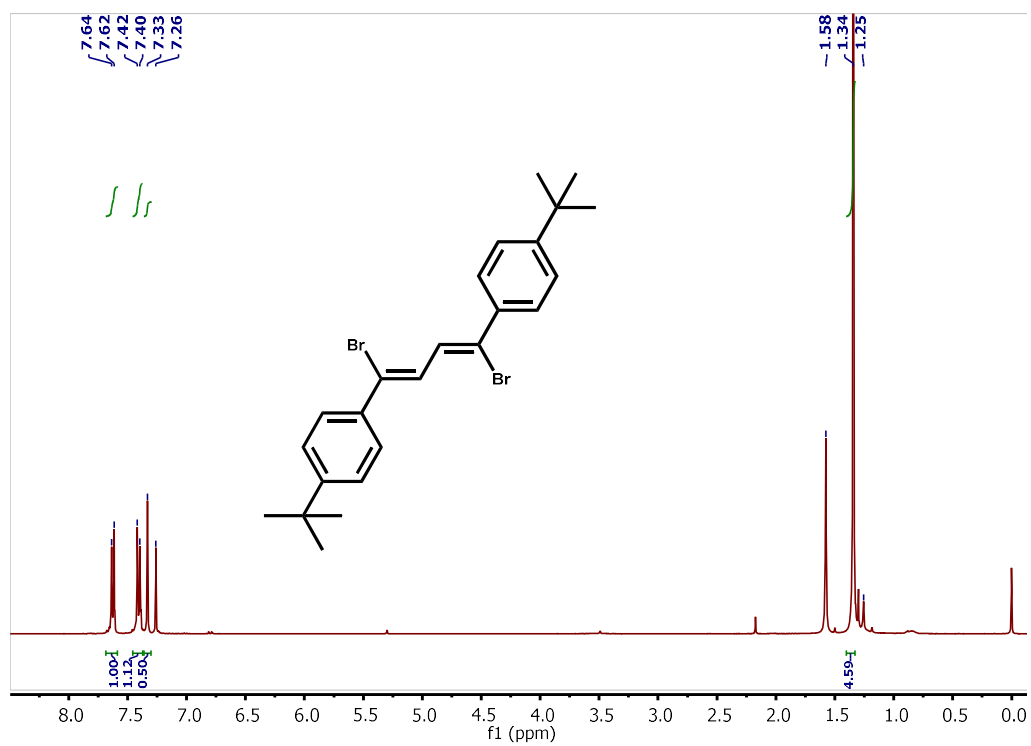

Fig.S1: <sup>1</sup>H NMR of (1Z, 3Z)-1,4-dibromo-1,4-ditertbutylphenyl-but-1,3-diene (1)

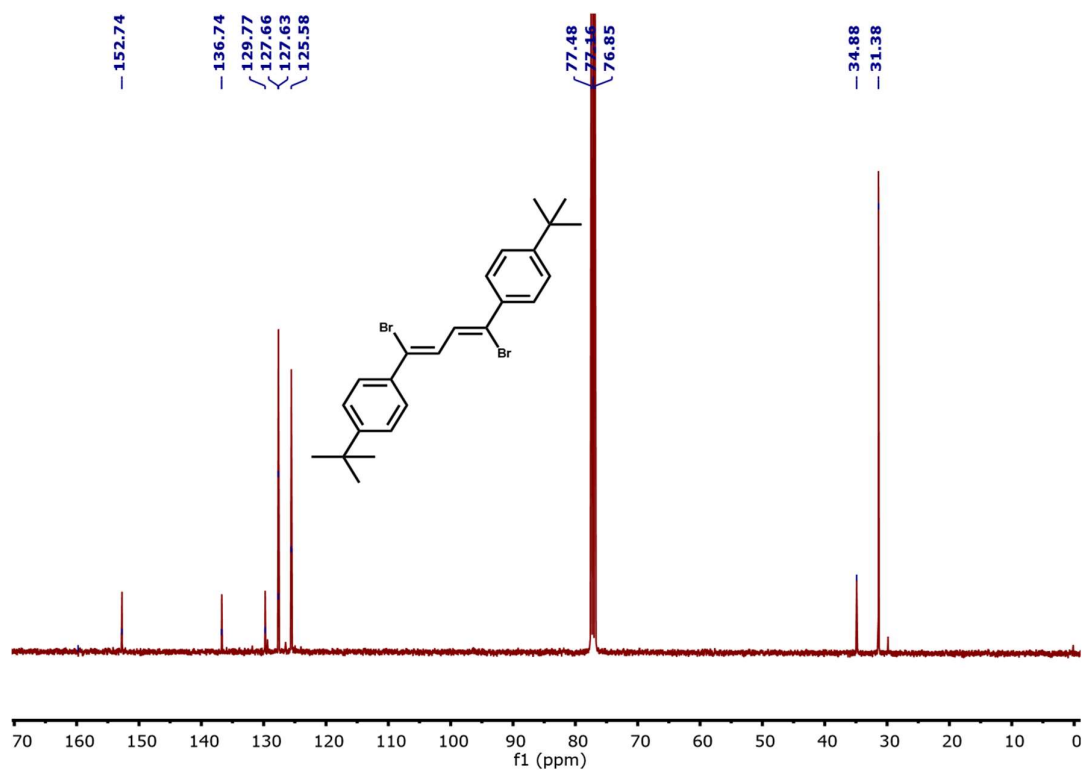

Fig.S2:  $^{13}\text{C}$  NMR of (1Z, 3Z)-1, 4-dibromo-1,4-ditertbutylphenyl-buta-1,3-diene (1)

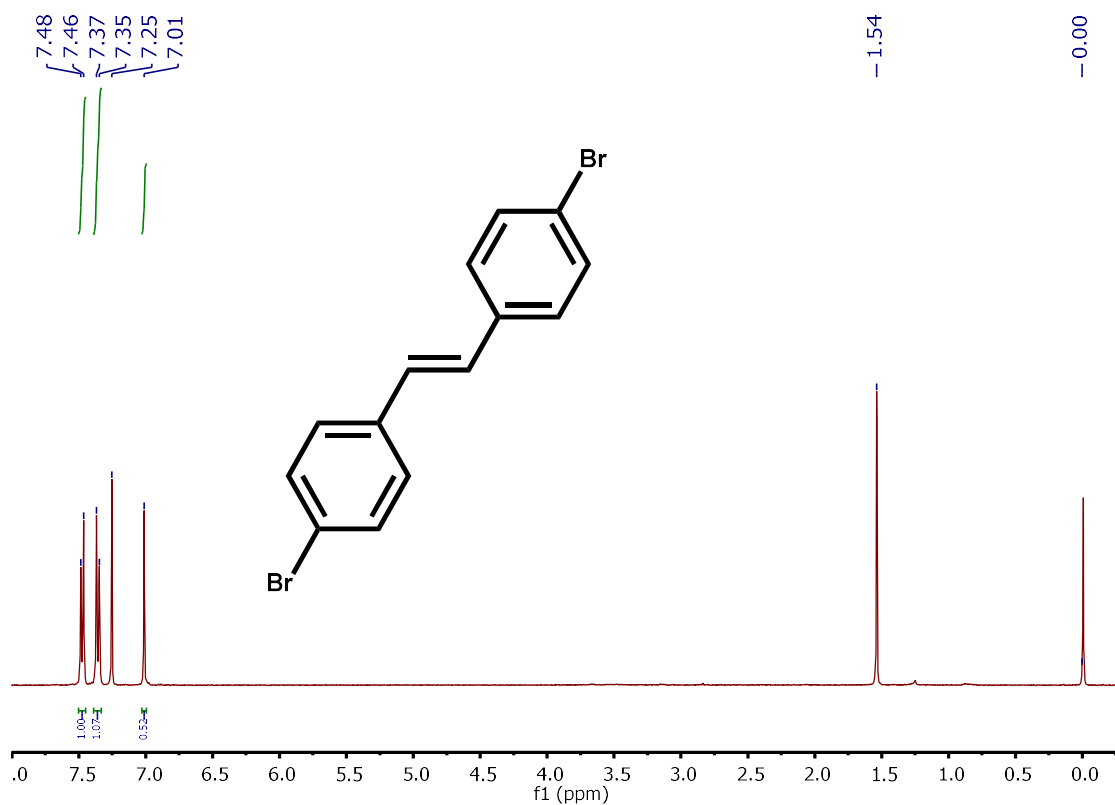

Fig.S3:  $^1\text{H}$  NMR of (E)-1,2-Bis(4-bromophenyl)ethene (2)

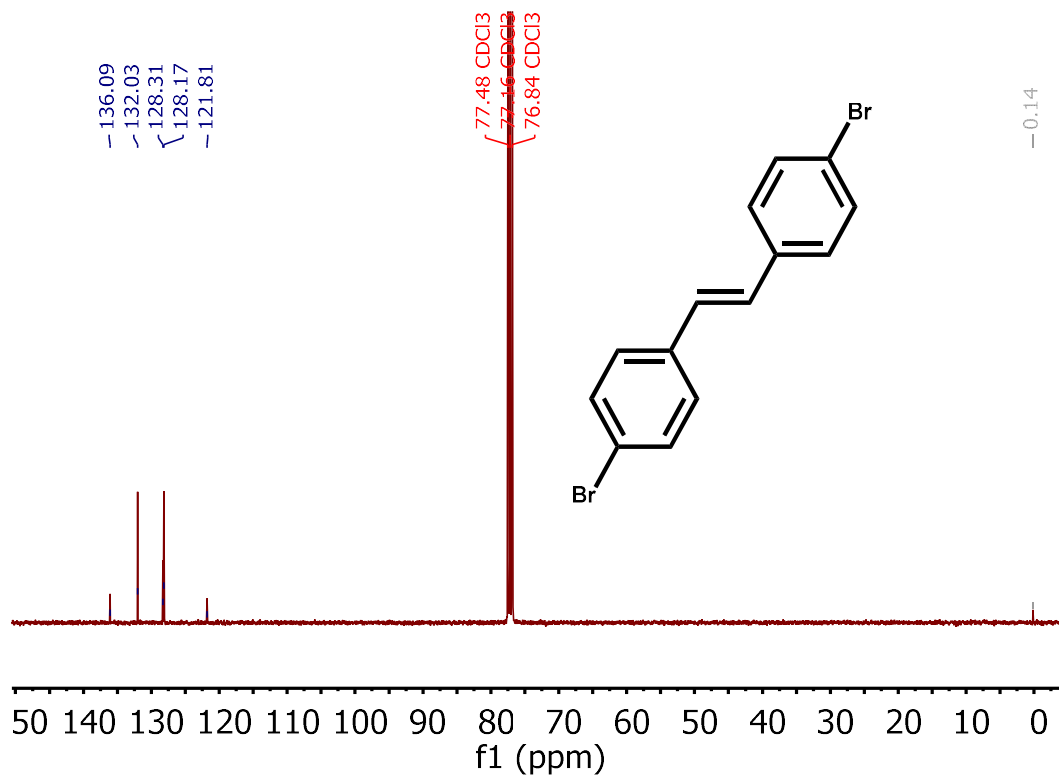

Fig.S4:  $^{13}\text{C}$  NMR of (E)-1,2-Bis(4-bromophenyl)ethene (2)

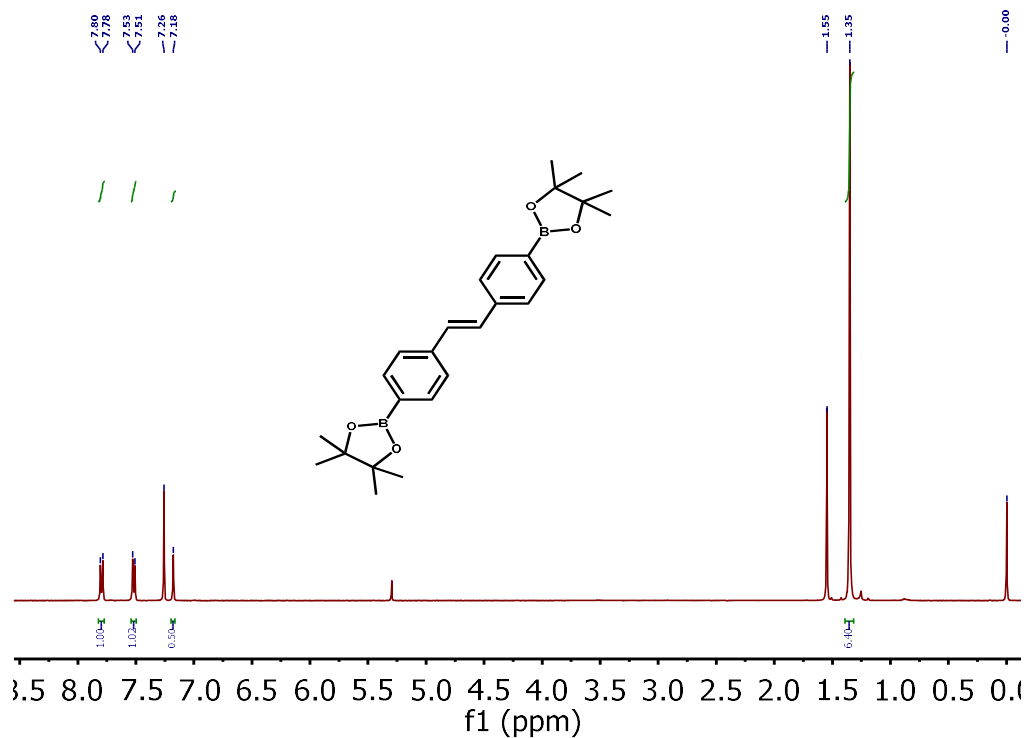

Fig.S5:  $^1\text{H}$  NMR of (E)-1,2-Bis(4-(4,4,5,5-tetramethyl-1,3,2-dioxaborolan-2-yl)-phenyl)ethene (5)

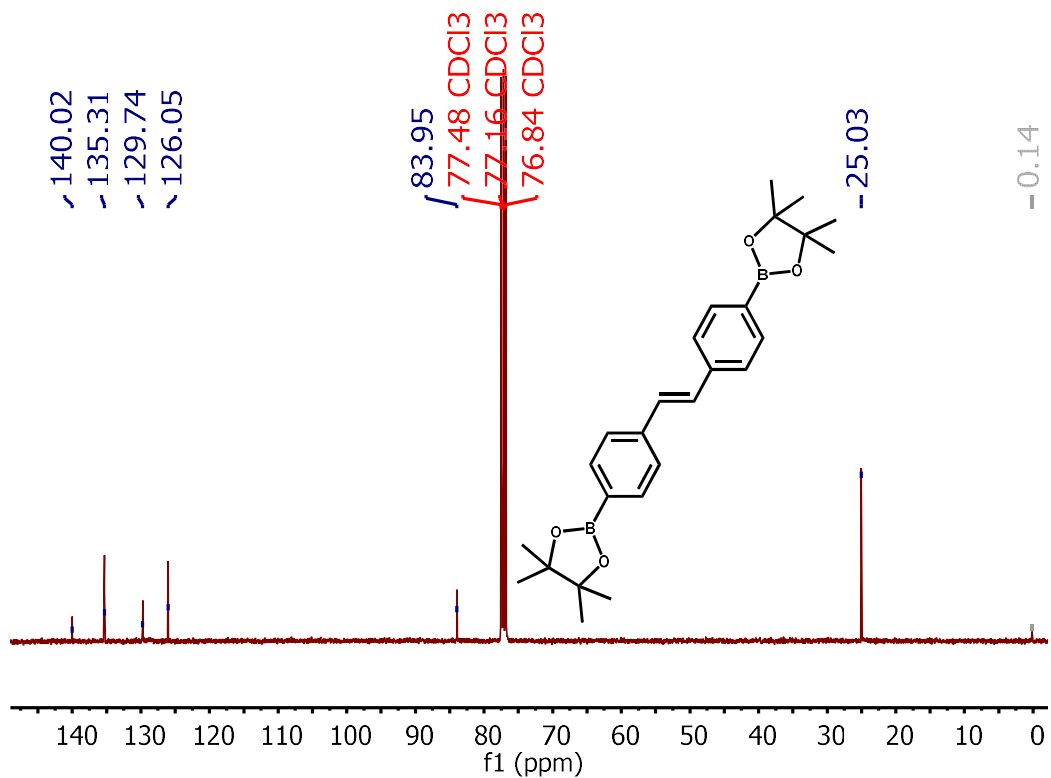

**Fig. S6:**  $^{13}\text{C}$  NMR of (E)-1,2-Bis(4-(4,4,5,5-tetramethyl-1,3,2-dioxaborolan-2-yl)phenyl)ethene (5)

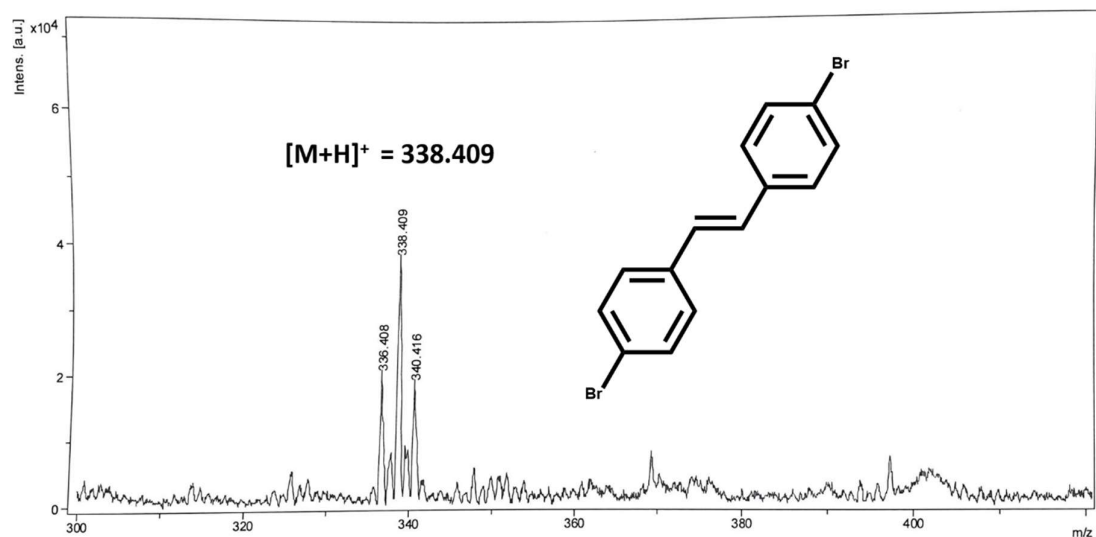

**Fig.S7:** MALDI-TOF mass of (E)-1,2-Bis(4-bromophenyl)ethene (2)

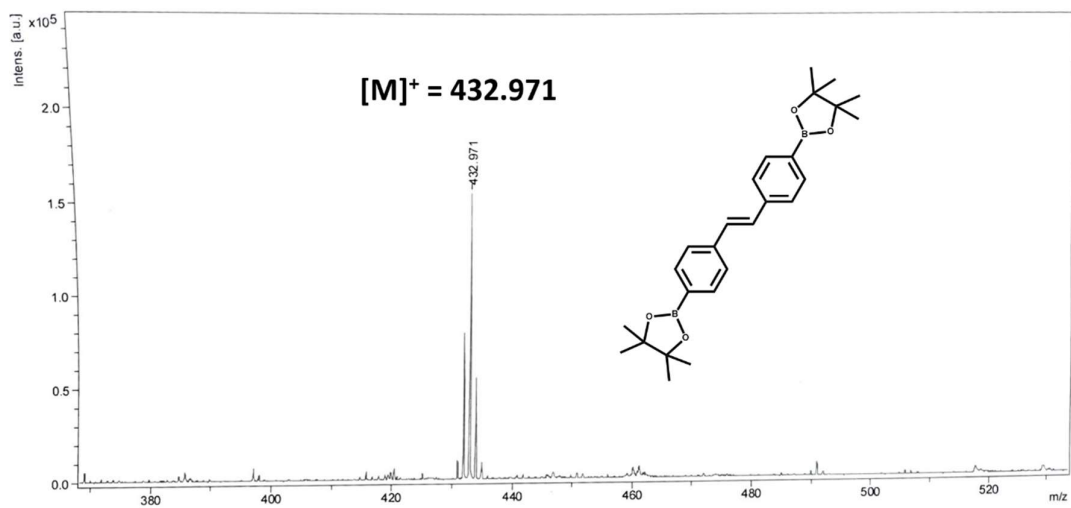

**Fig.S8:** MALDI-TOF mass of (E)-1,2-Bis(4-(4,4,5,5-tetramethyl-1,3,2-dioxaborolan-2-yl)phenyl)ethene (5)

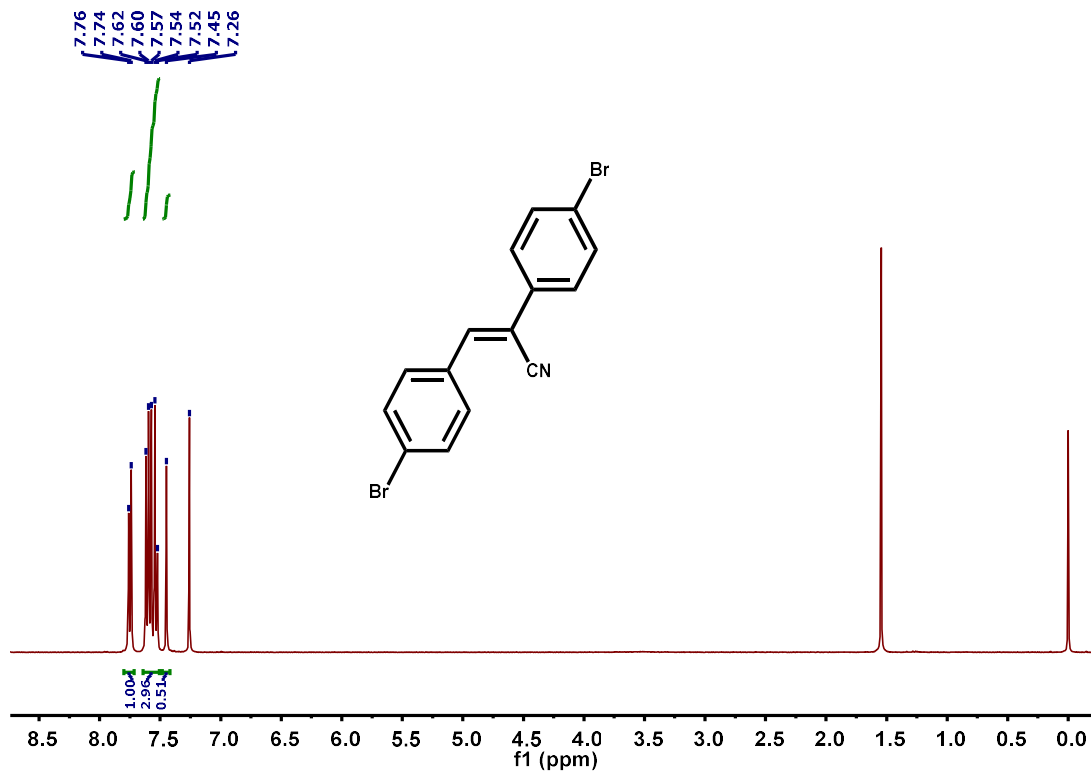

Fig.S9: <sup>1</sup>H NMR of (Z)-2,3-bis(4-bromophenyl)acrylonitrile (3)

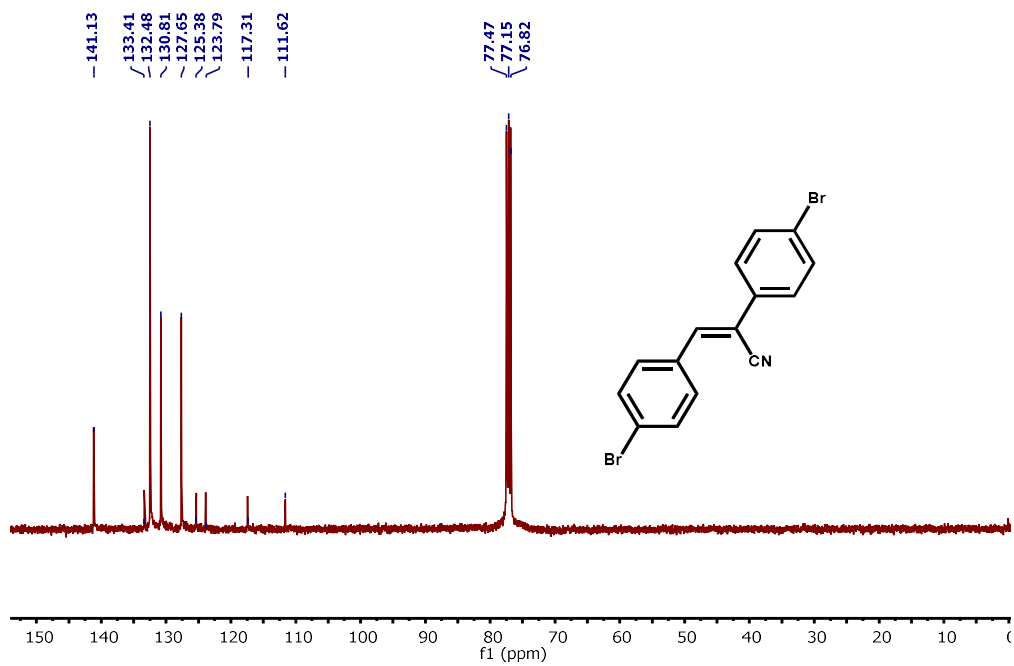

Fig.S10:  $^{13}\text{C}$  NMR of (Z)-2,3-bis(4-bromophenyl)acrylonitrile (3)

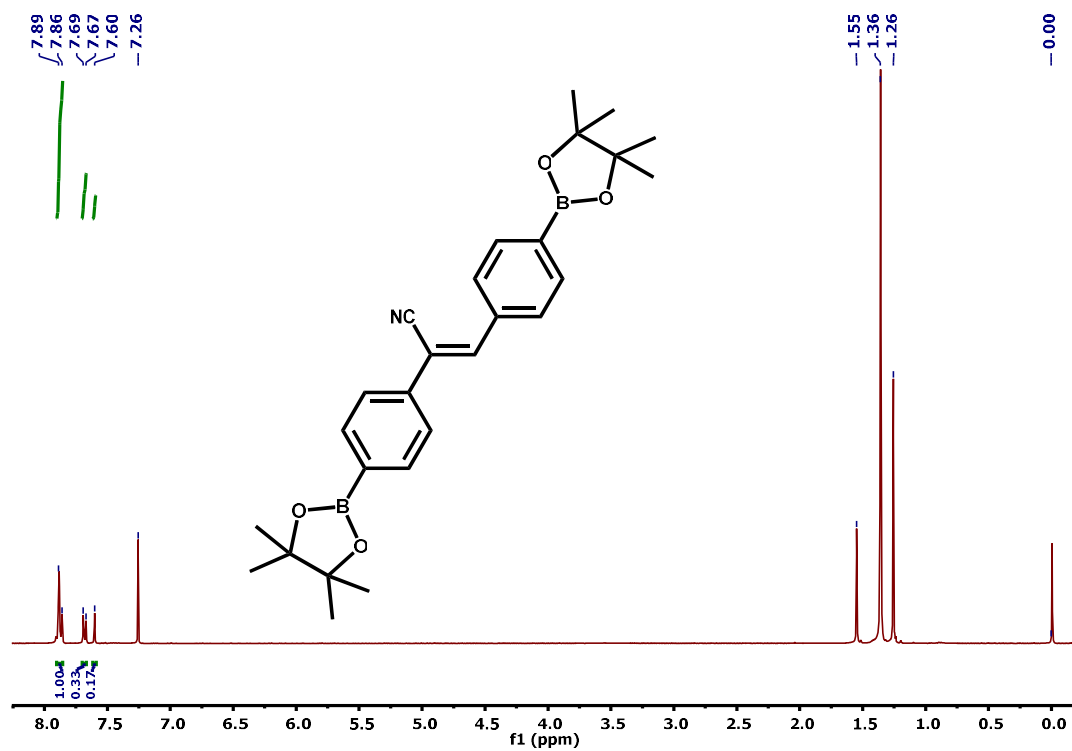

Fig.S11:  $^1\text{H}$  NMR of (Z)-2,3-bis(4-(4,4,5,5-tetramethyl-1,3,2-dioxaborolan-yl)phenyl)acrylonitrile(6)

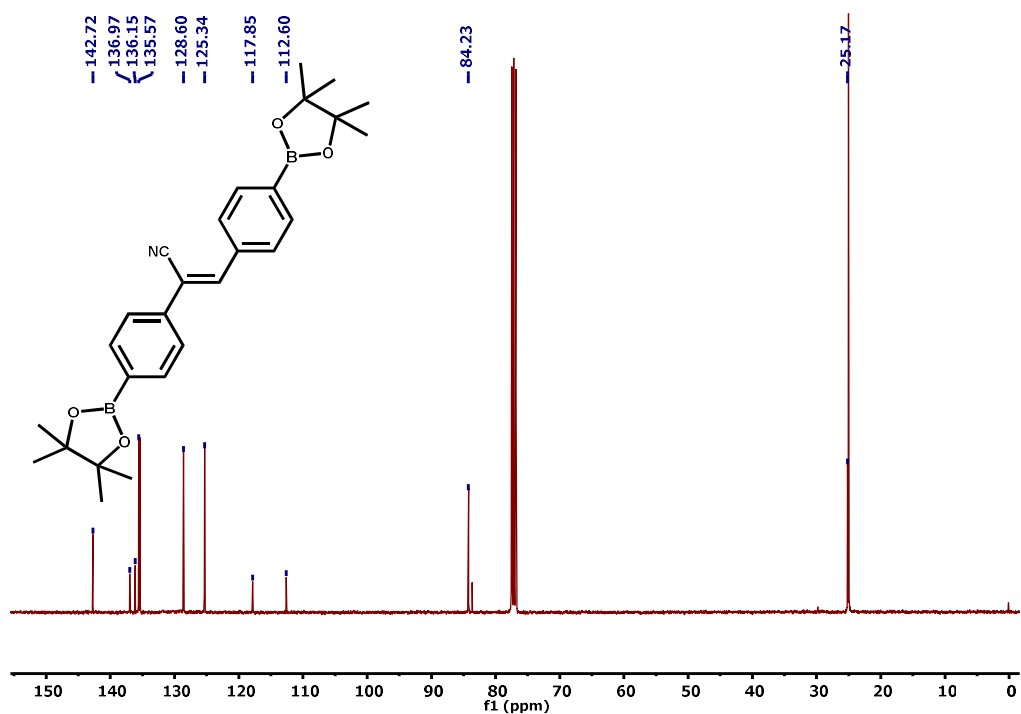

**Fig.S12:**  $^{13}\text{C}$  NMR of (Z)-2,3-bis(4-(4,4,5,5-tetramethyl-1,3,2-dioxaborolan-yl)phenyl)acrylonitrile(6)

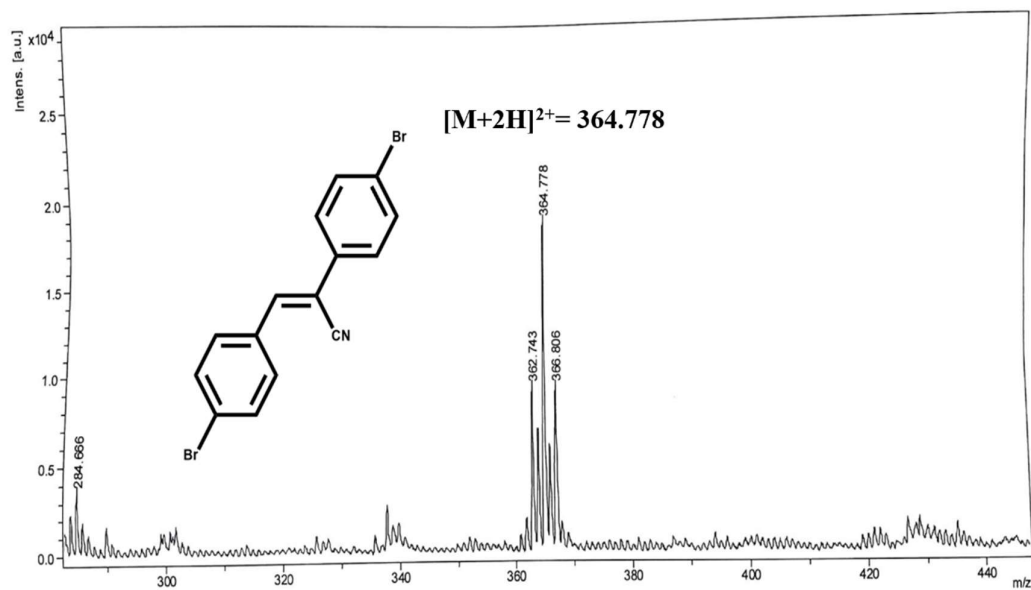

**Fig.S13:** MALDI-TOF mass of (Z)-2,3-bis(4-bromophenyl)acrylonitrile (3)

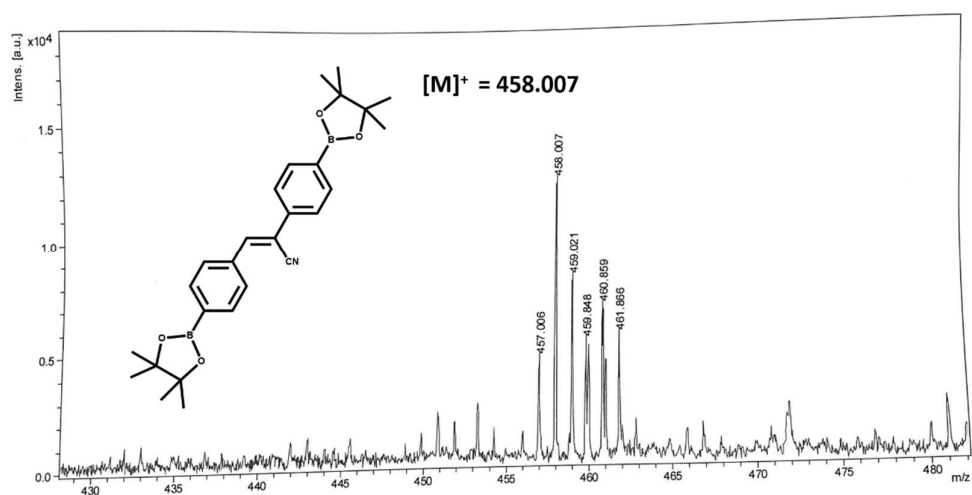

**Fig.S14:** MALDI-TOF mass of (Z)-2,3-bis(4-(4,4,5,5-tetramethyl-1,3,2-dioxaborolan-yl)phenyl)acrylonitrile(6)



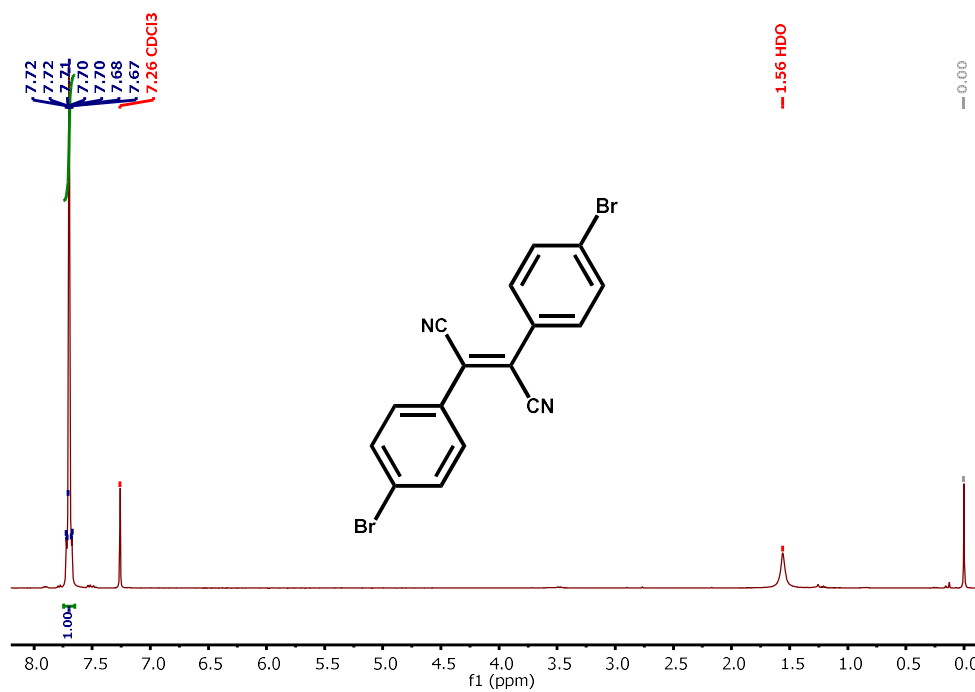

Fig.S15: <sup>1</sup>H NMR of 3-bis(4-bromophenyl) fumaronitrile(4)

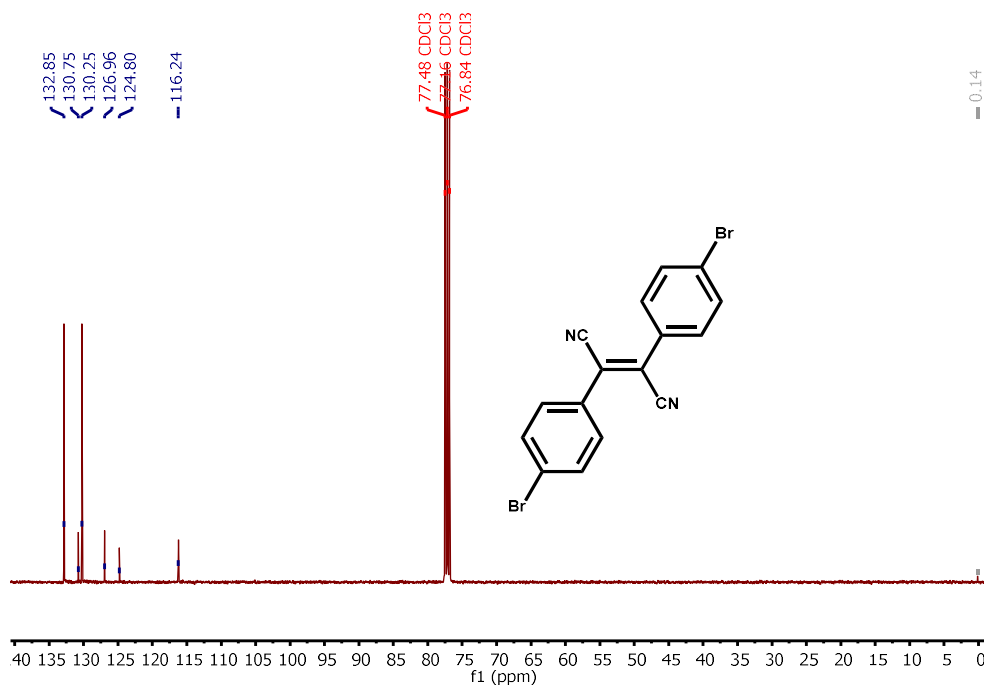

Fig.S16:  $^{13}\text{C}$  NMR of 2,3-bis(4-bromophenyl) fumaronitrile(4)

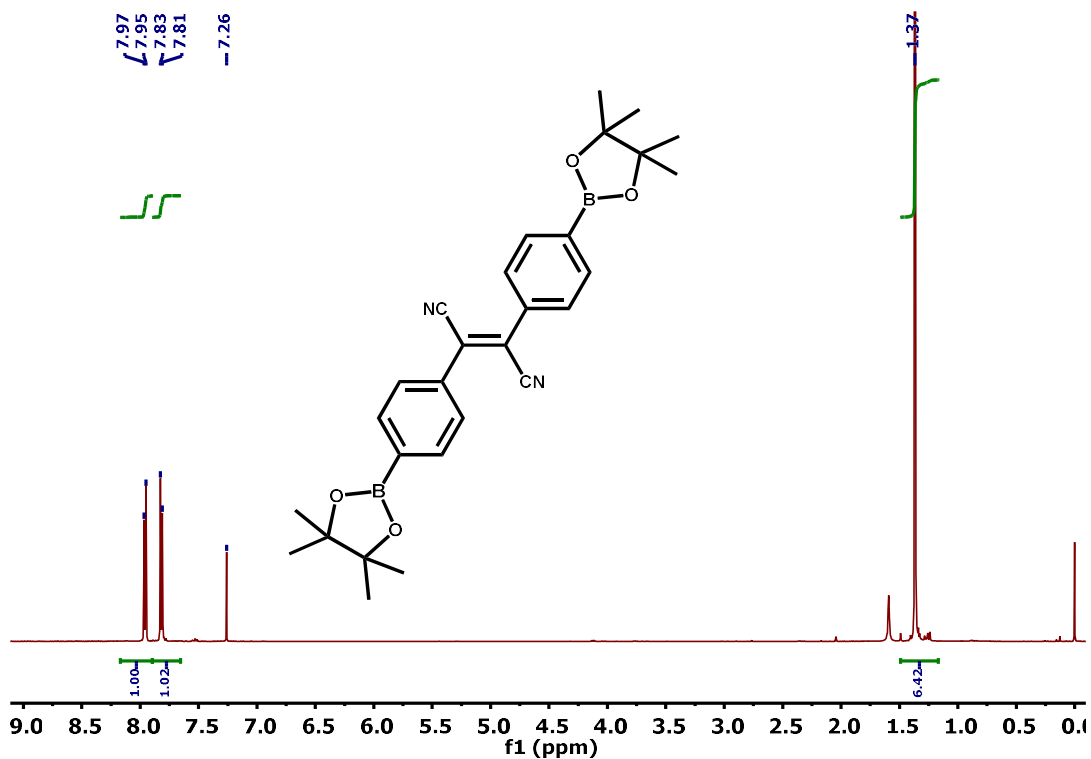

Fig.S17:  $^1\text{H}$  NMR of 2,3-bis(4-(4,4,5,5-tetramethyl-1,3,2-dioxaborolan-2-yl)phenyl)-fumaronitrile(7)

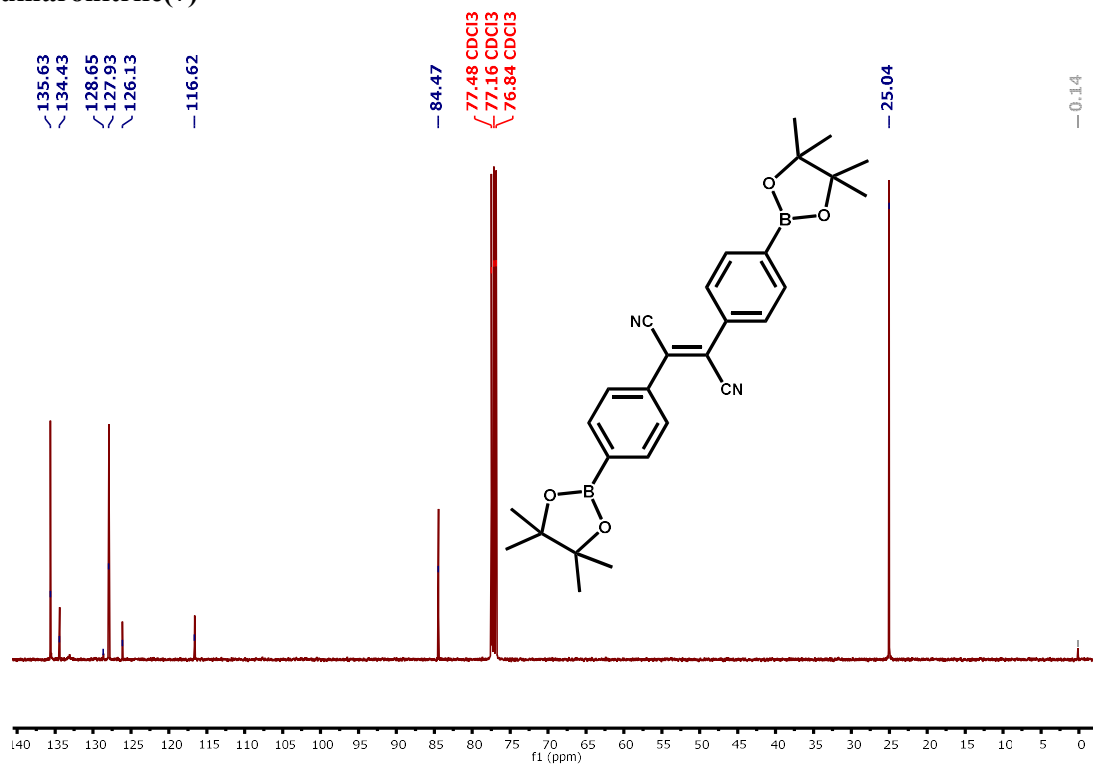

**Fig.S18:**  $^{13}\text{C}$  NMR of 2,3-bis(4-(4,4,5,5-tetramethyl-1,3,2-dioxaborolanyl)phenyl)fumaronitrile(7).

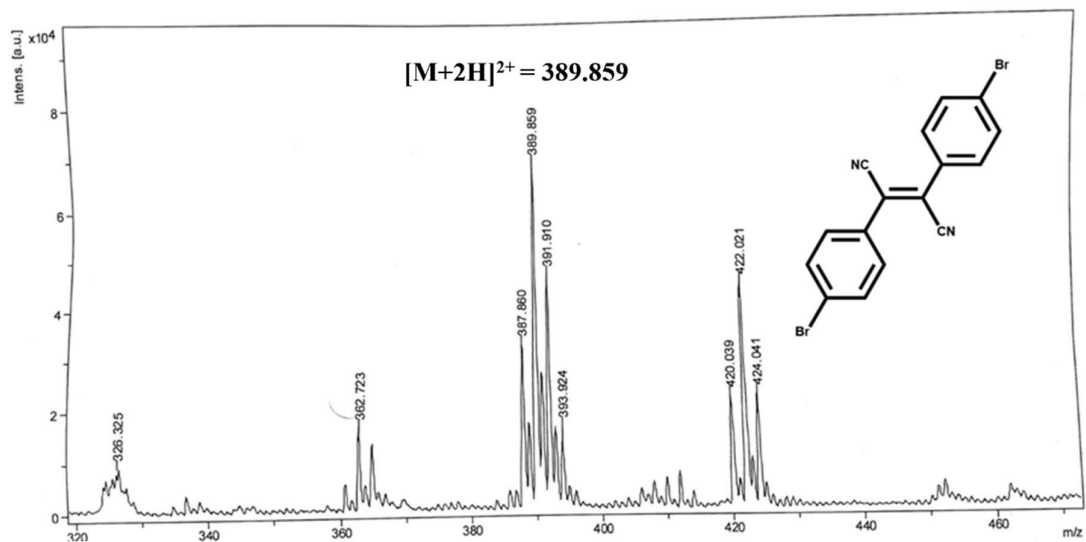

**Fig. S19:** MALDI-TOF mass of 2,3-bis(4-bromophenyl)fumaronitrile(4)

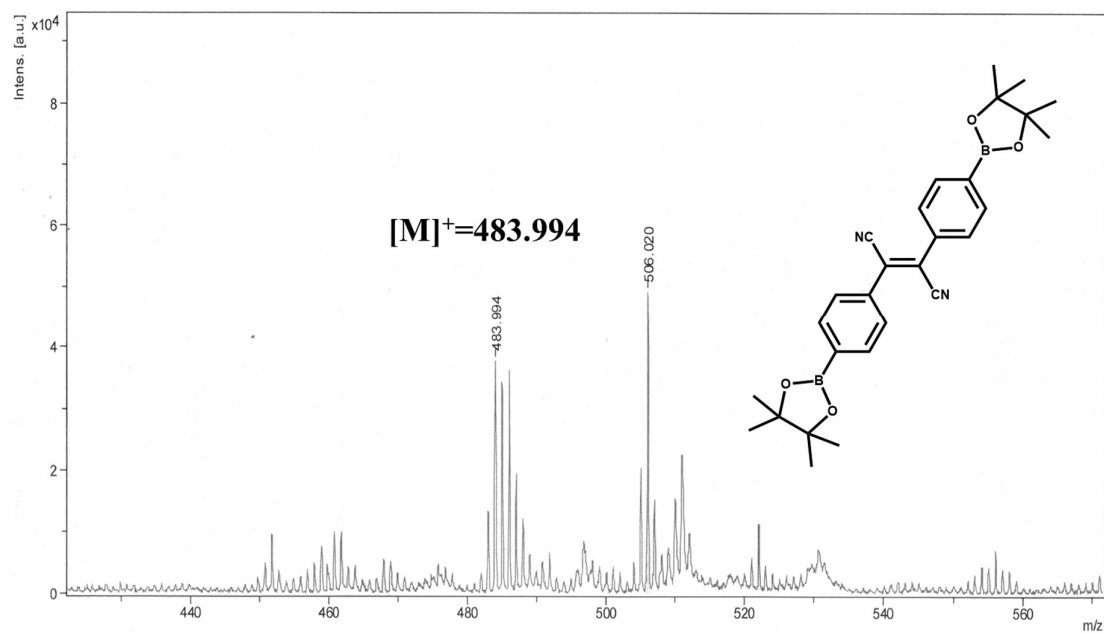

Fig. S20: MALDI-TOF mass of 2,3-bis(4-(4,4,5,5-tetramethyl-1,3,2-dioxaborolanyl)phenyl)fumaronitrile (7)

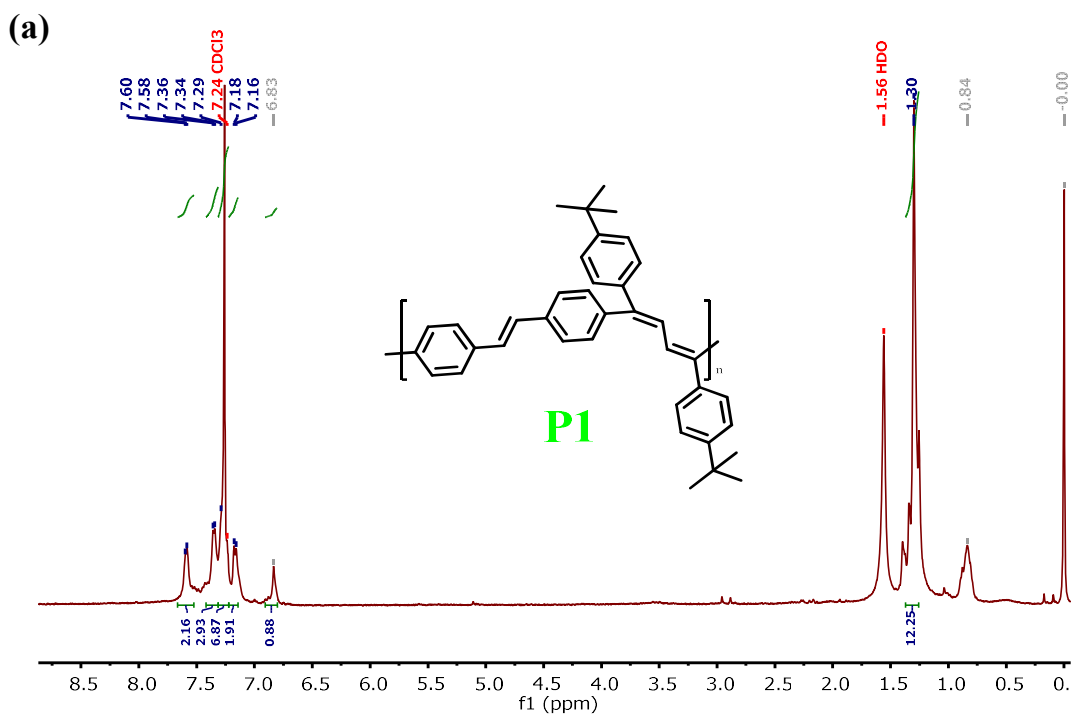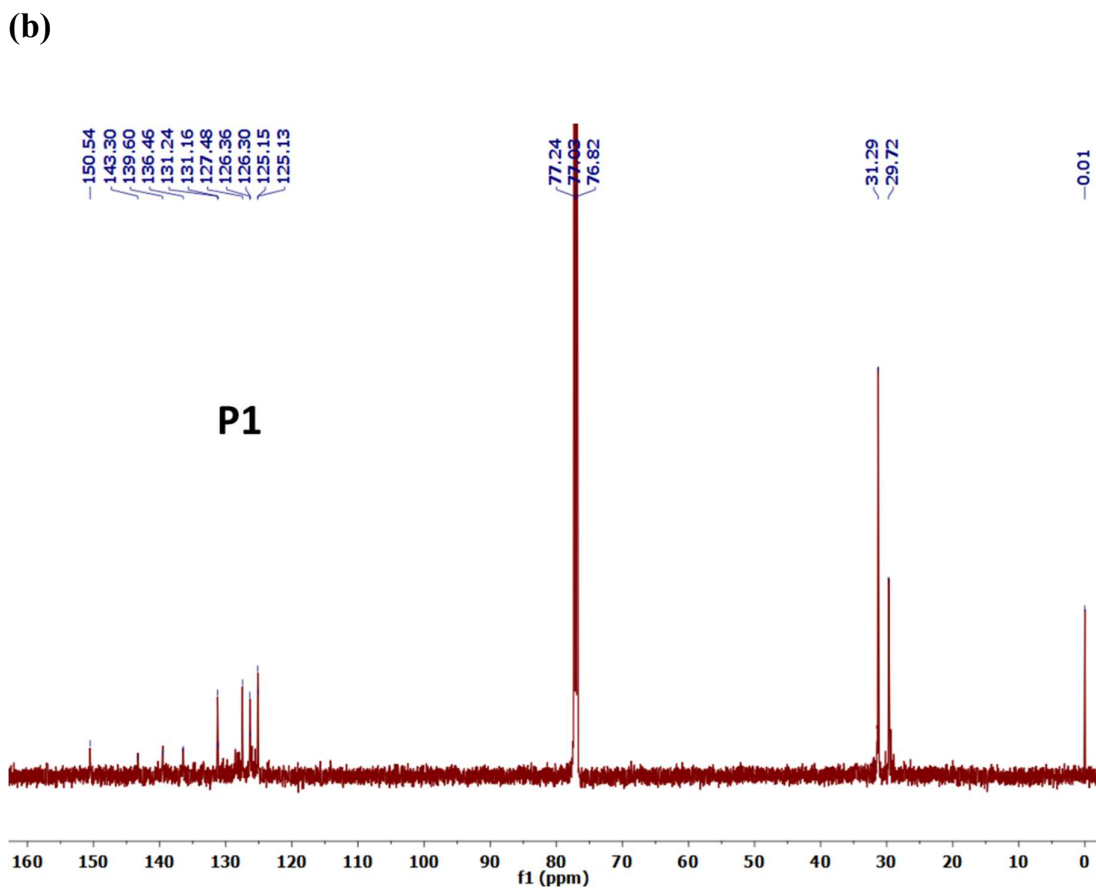

Fig. S21: (a)  $^1\text{H}$  NMR and (b)  $^{13}\text{C}$  NMR of copolymer, P1 in  $\text{CDCl}_3$ .

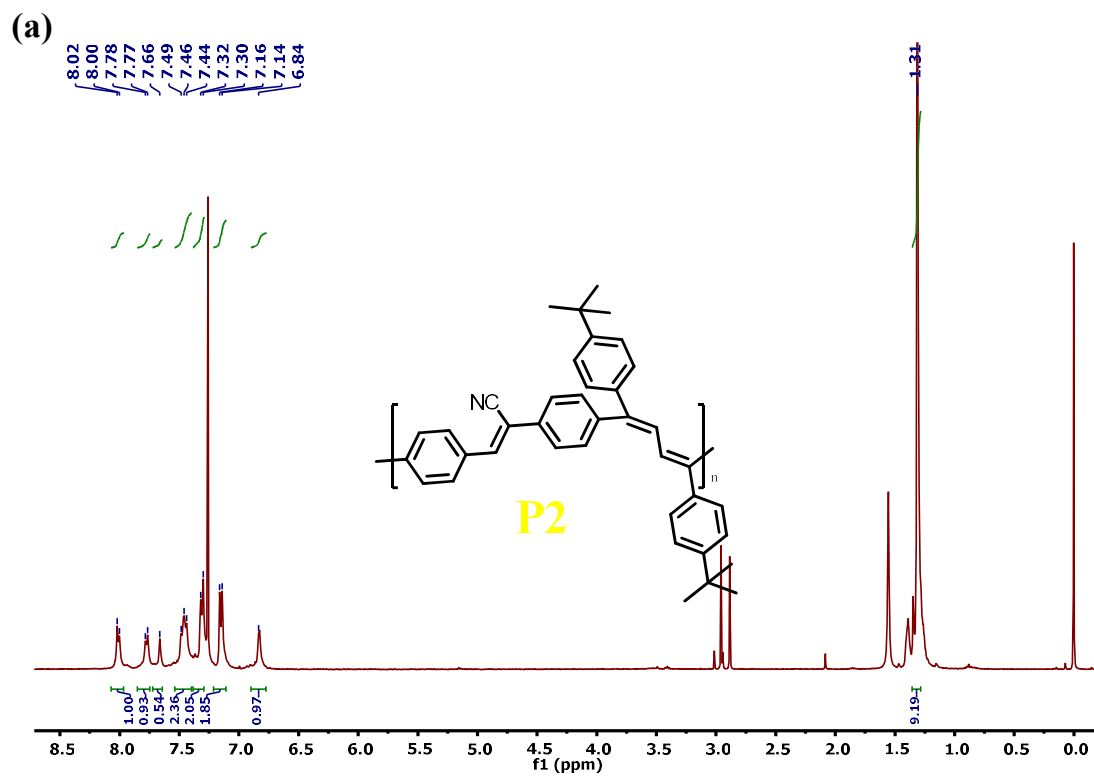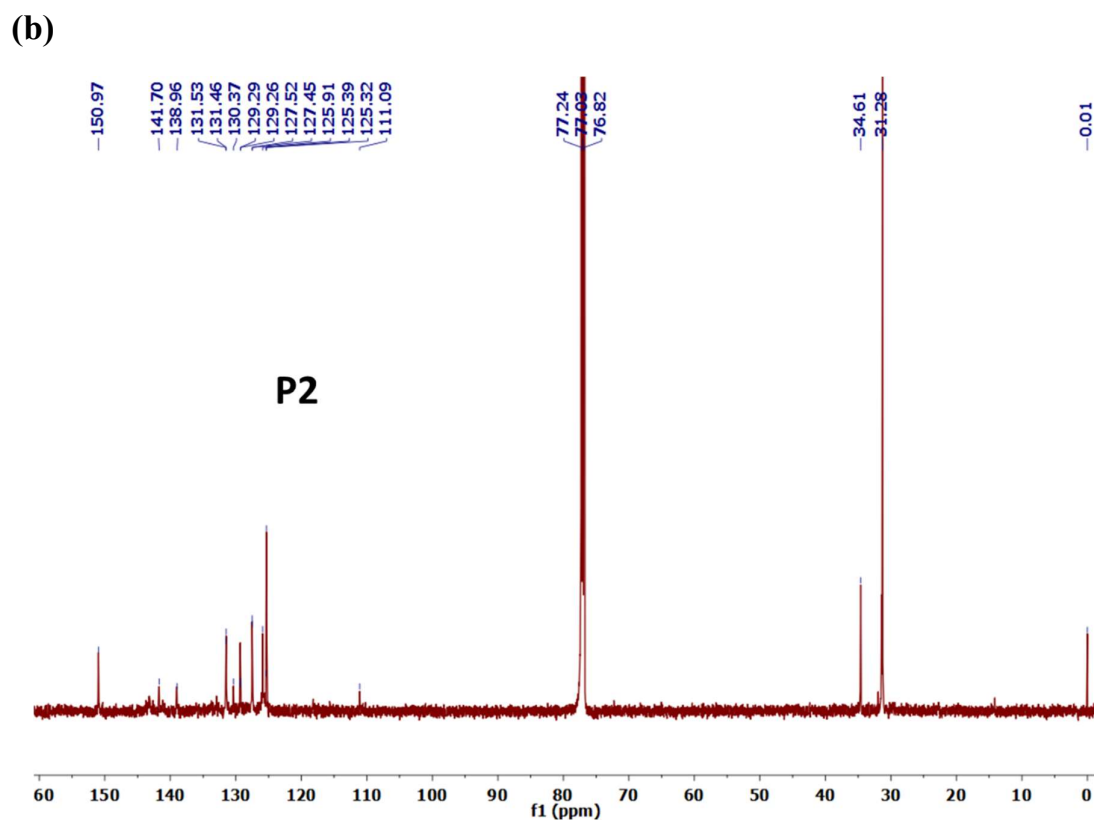

Fig. S22: (a)  $^1\text{H}$  NMR and (b)  $^{13}\text{C}$  NMR of copolymer, P2 in  $\text{CDCl}_3$ .

(a)

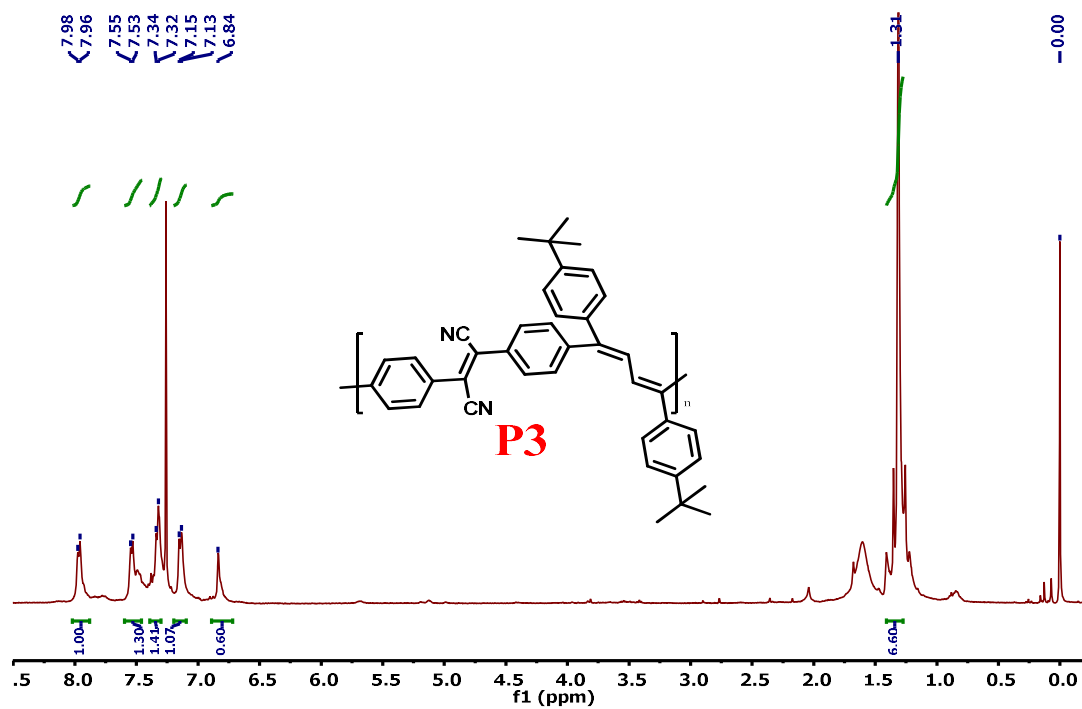

(b)

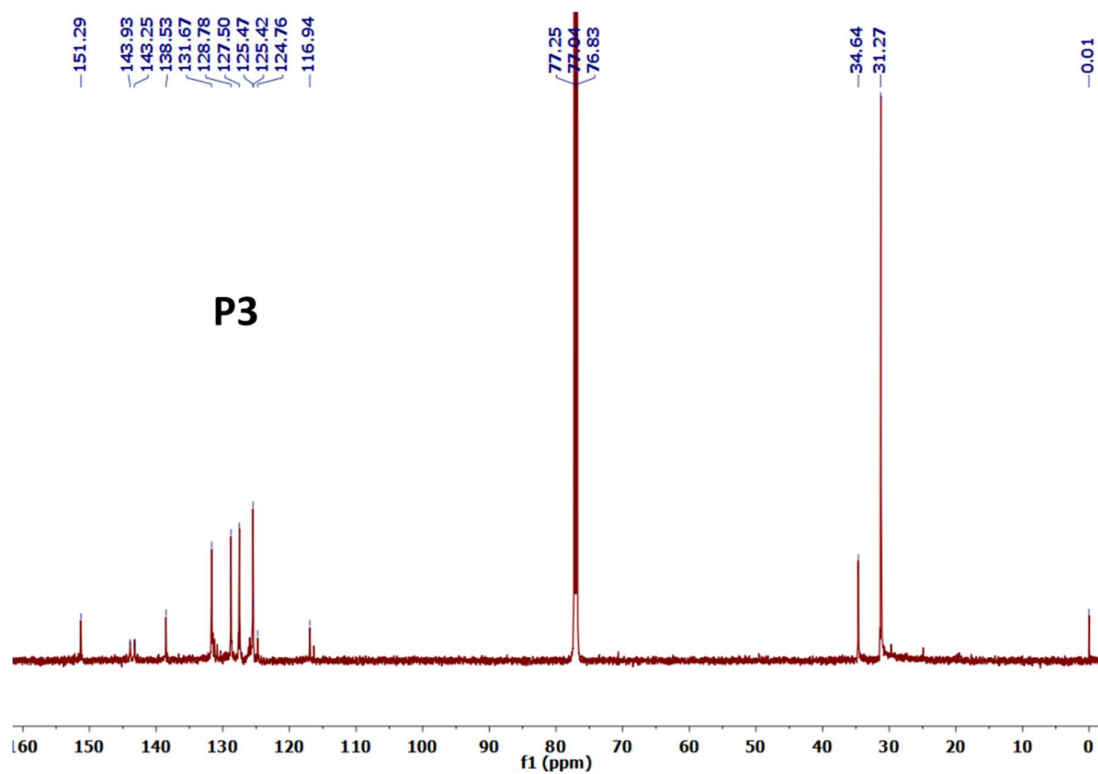

Fig. S23: (a)  $^1\text{H}$  NMR and (b)  $^{13}\text{C}$  NMR of copolymer, P3 in  $\text{CDCl}_3$ .

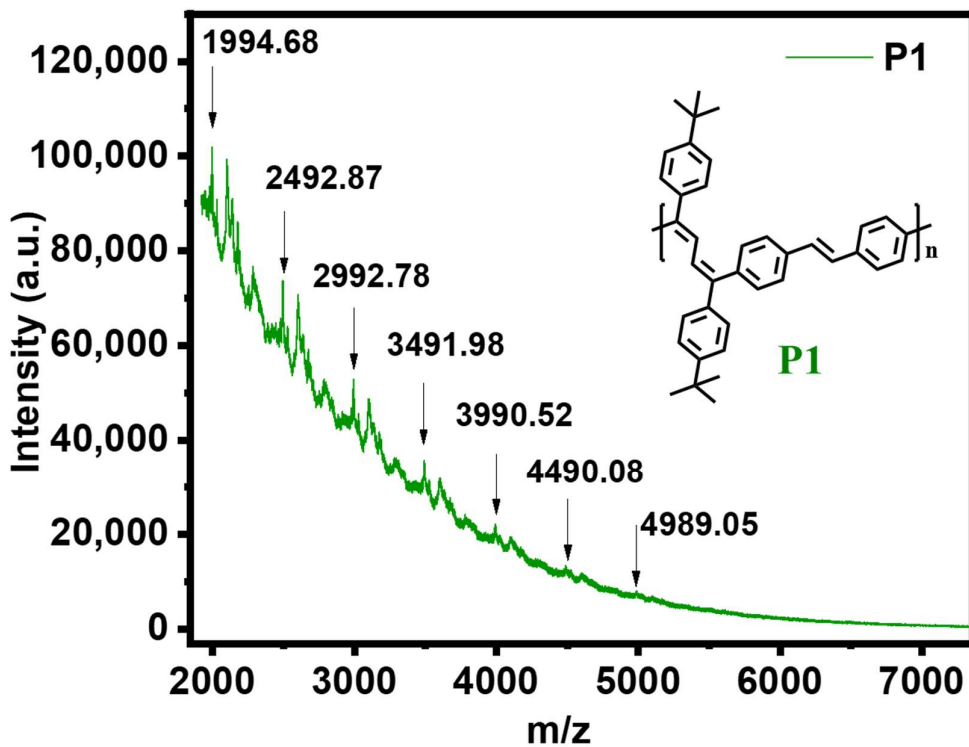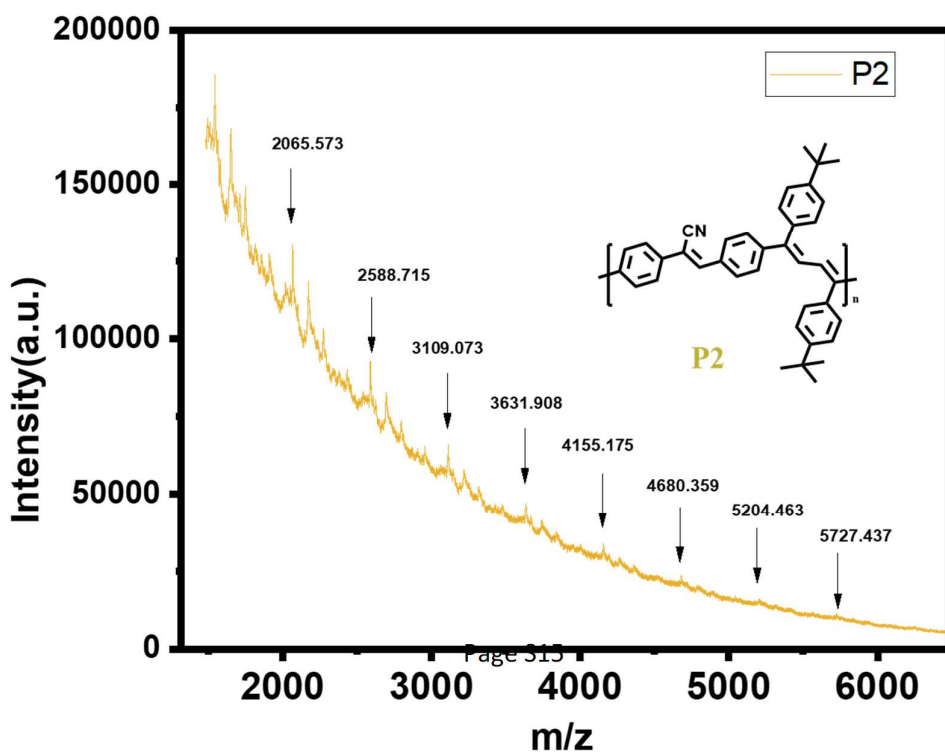

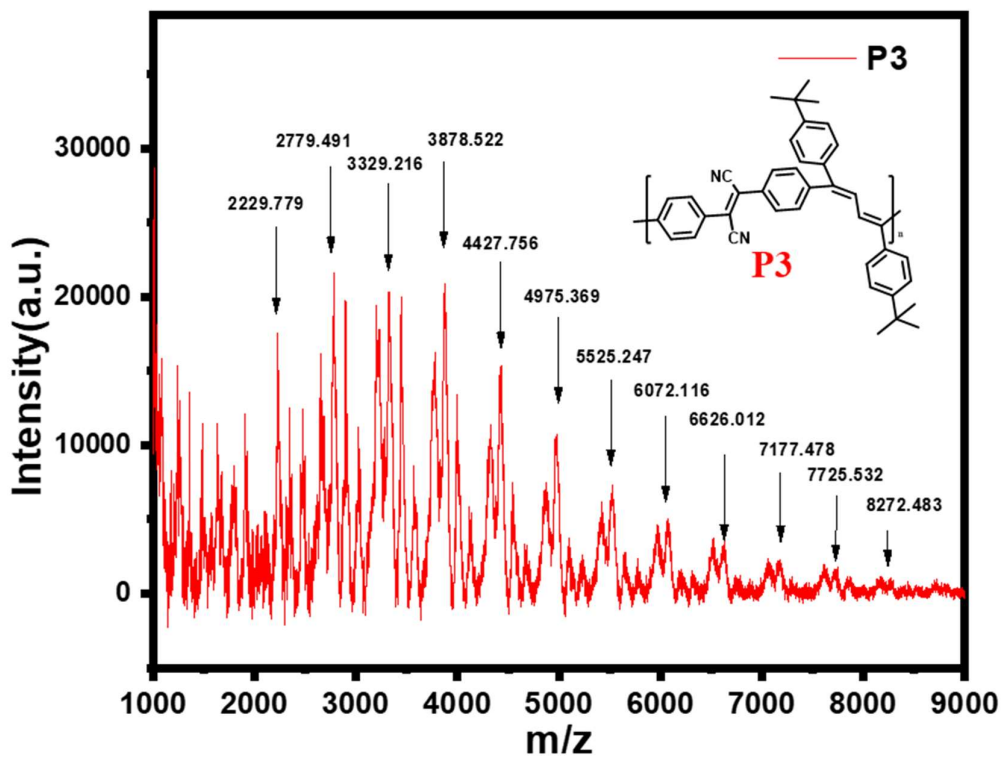

Fig. S24: MALDI-TOF spectra of copolymers, P1, P2 and P3 in dithranol matrix.

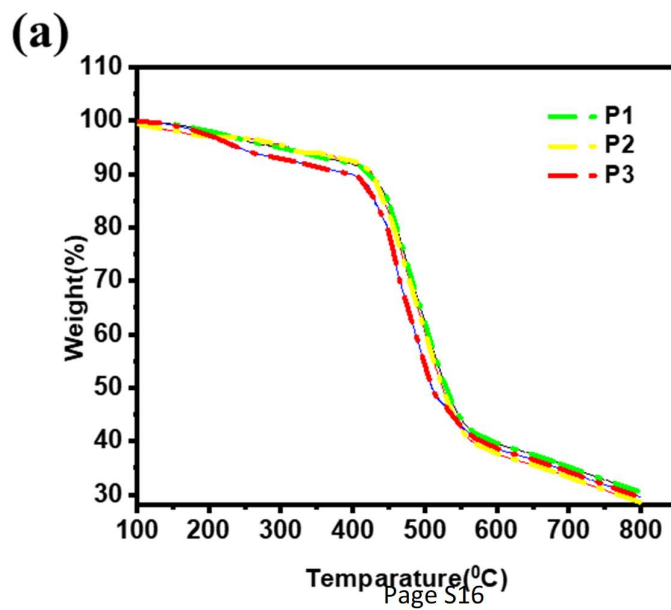



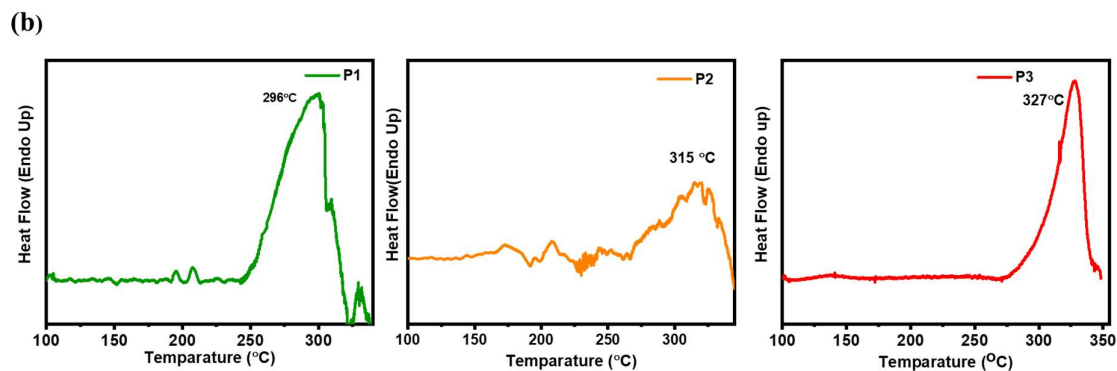

**Fig. S25: (a) TGA traces of copolymers P1, P2 and P3 and (b) DSC trace of copolymer P1, P2 and P3 (the phase transition peak at 296 °C, 315 °C and 327 °C and the enthalpy change 1.6 J/g, 3.5 J/g and 8.1 J/g respectively)**

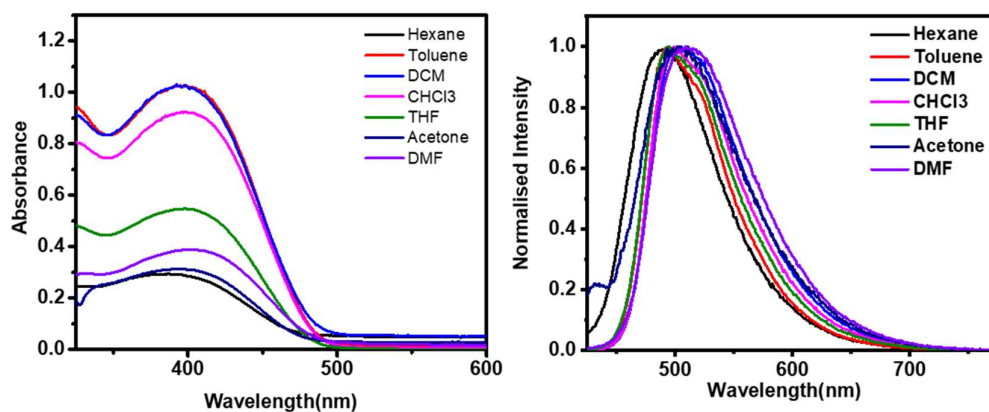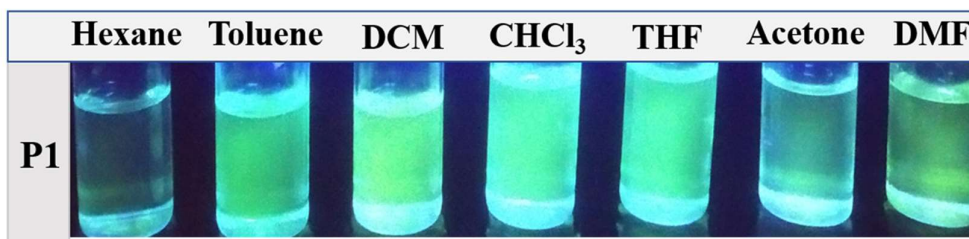

**Fig. S26: Solvent dependent UV-Vis and fluorescence spectra (upper) and fluorescence color in various solvents under UV light (lower) of copolymer, P1.**

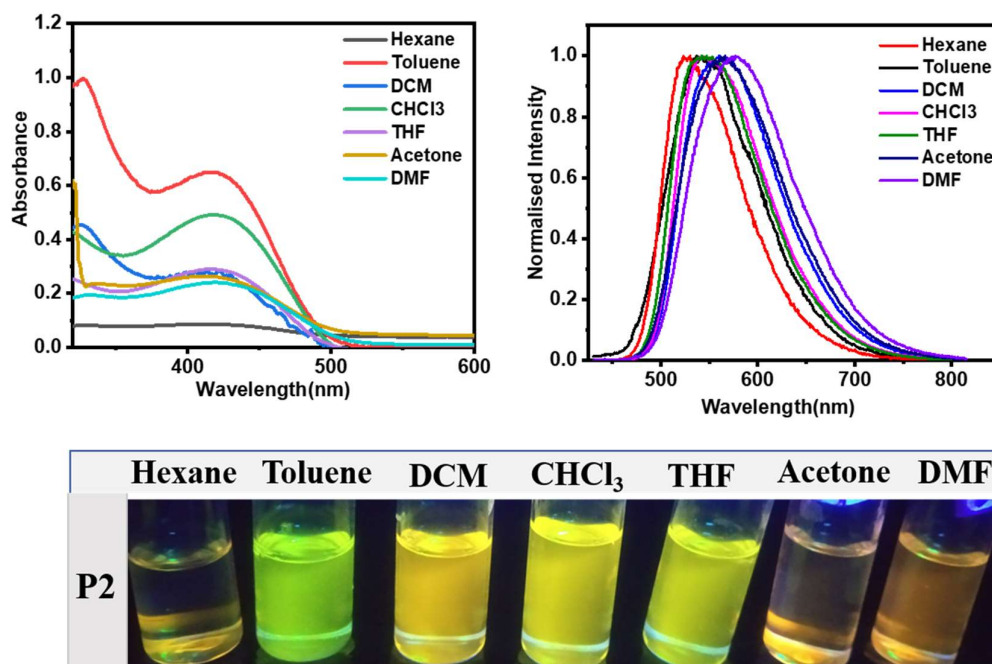

Fig. S27: Solvent dependent UV-Vis and fluorescence spectra (upper) and fluorescence color in various solvents under UV light (lower) of copolymer, P2.

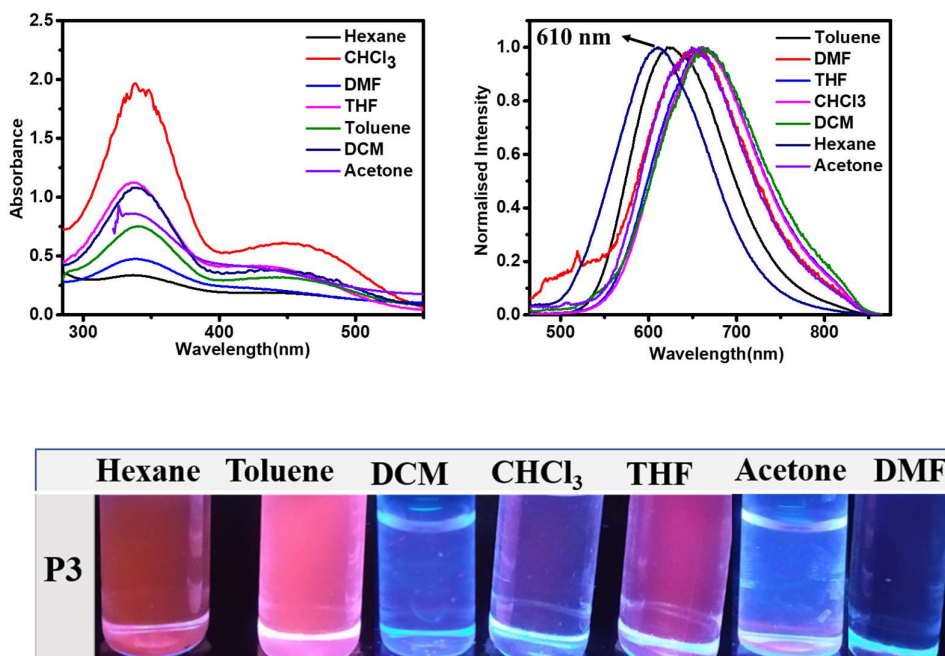

Fig. S28: Solvent dependent UV and fluorescence spectra (upper) and fluorescence color in various solvents under UV light (lower) of copolymer, P3.

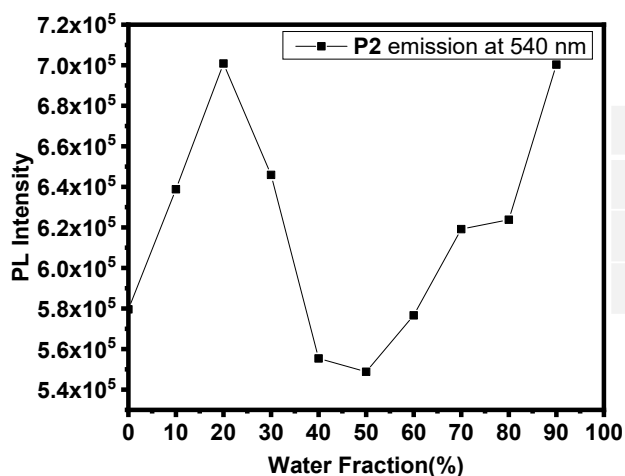

| Polymer | Solution   | Film       |
|---------|------------|------------|
| P1      | 0.28, 0.53 | 0.36, 0.58 |
| P2      | 0.45, 0.53 | 0.51, 0.48 |
| P3      | 0.61, 0.38 | 0.66, 0.34 |

Fig. S29: Emission intensity change vs water fraction (%) of copolymer, P2 and CIE coordinates calculated from CIE chromaticity diagram.

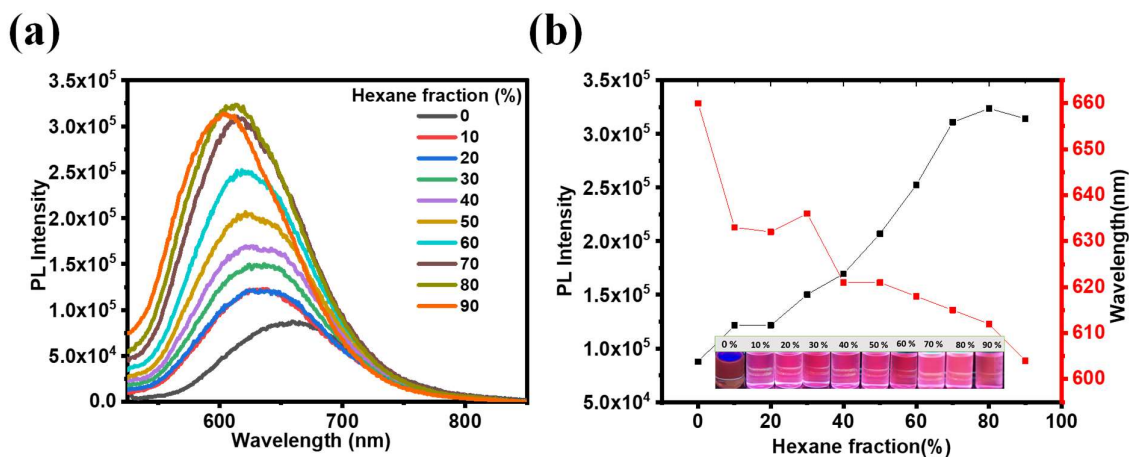

Fig. S30: (a) Emission spectra of P3 in hexane/THF mixture (b) Plot of emission intensity/wavelength vs hexane fraction (%), emission colour at different hexane fraction (inset) of copolymer, P3.

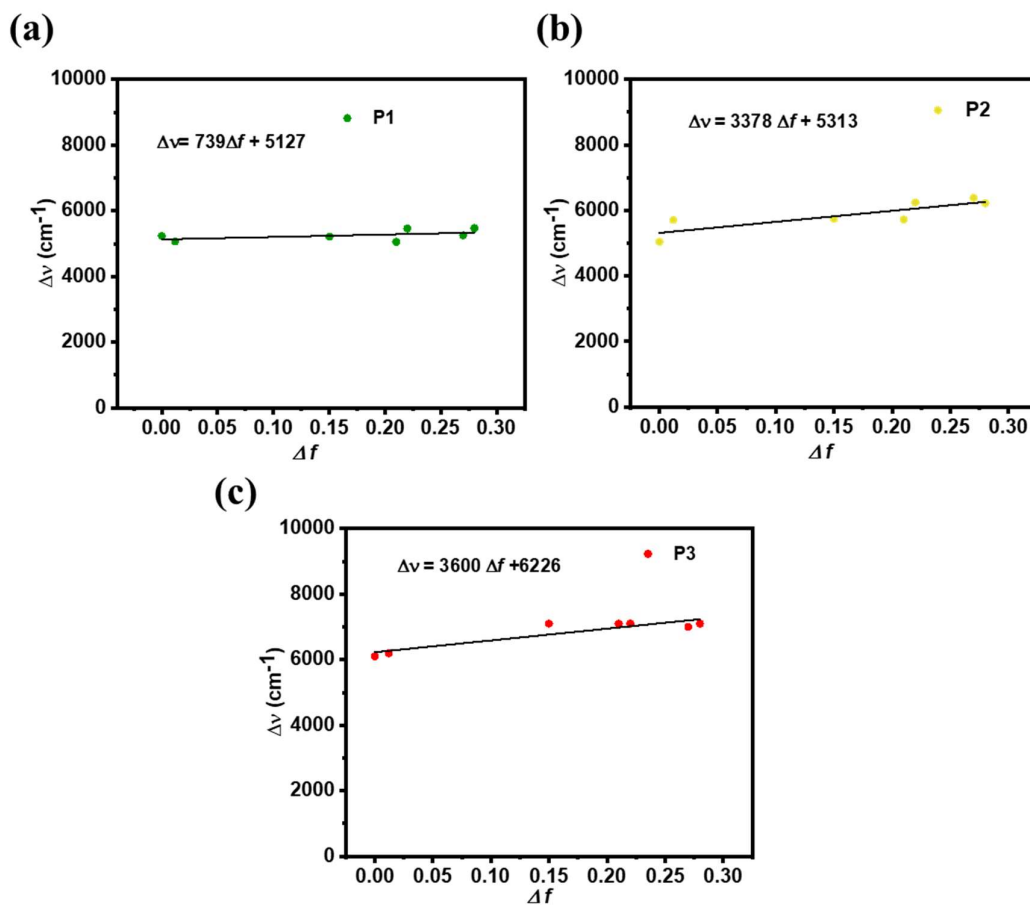

**Fig. S31: Lippert-Mataga plot with best liner fitting of the copolymers for (a) P1 (b) P2 and (c) P3. Values were taken from Table-S1.**

To better understand the effects of solvatochromic, the relationship between the solvent polarity parameter ( $\Delta f$ ) and the Stokes shift ( $\Delta\nu$ ,  $\text{cm}^{-1}$ ) according to the Lippert–Mataga equation was investigated according to reported equation.

**Table -S1:** Value for Lippert-Mataga plot <sup>S1</sup>

| <b>Copolymer</b> | <b>Solvent</b>    | $\Delta f$ | $\lambda_{\text{abs}}$ (nm) | $\lambda_{\text{FL}}$ (nm) | <b>Stokes shift</b><br>( $\Delta\nu$ , $\text{cm}^{-1}$ ) |
|------------------|-------------------|------------|-----------------------------|----------------------------|-----------------------------------------------------------|
| <b>P1</b>        | Hexane            | 0.00       | 390                         | 490                        | 5232                                                      |
|                  | Toluene           | 0.01       | 395                         | 494                        | 5073                                                      |
|                  | DCM               | 0.22       | 394                         | 502                        | 5460                                                      |
|                  | CHCl <sub>3</sub> | 0.15       | 396                         | 499                        | 5213                                                      |
|                  | THF               | 0.21       | 398                         | 498                        | 5045                                                      |
|                  | Acetone           | 0.28       | 395                         | 504                        | 5475                                                      |
|                  | DMF               | 0.27       | 399                         | 505                        | 5252                                                      |
| <b>P2</b>        | Hexane            | 0.00       | 417                         | 528                        | 5041                                                      |
|                  | Toluene           | 0.01       | 415                         | 544                        | 5714                                                      |
|                  | DCM               | 0.22       | 416                         | 562                        | 6244                                                      |
|                  | CHCl <sub>3</sub> | 0.15       | 418                         | 550                        | 5741                                                      |
|                  | THF               | 0.21       | 416                         | 546                        | 5723                                                      |
|                  | Acetone           | 0.28       | 418                         | 565                        | 6224                                                      |
|                  | DMF               | 0.27       | 418                         | 570                        | 6379                                                      |
| <b>P3</b>        | Hexane            | 0.00       | 445                         | 611                        | 6105                                                      |
|                  | Toluene           | 0.01       | 450                         | 624                        | 6197                                                      |
|                  | DCM               | 0.22       | 450                         | 664                        | 7162                                                      |
|                  | CHCl <sub>3</sub> | 0.15       | 450                         | 662                        | 7116                                                      |
|                  | THF               | 0.21       | 450                         | 660                        | 7070                                                      |
|                  | Acetone           | 0.28       | 445                         | 651                        | 7110                                                      |
|                  | DMF               | 0.27       | 445                         | 650                        | 7087                                                      |

| <b>Copolymer</b> | <b>Slope value</b> | <b>Intercept value</b> | <b>Correlation coefficient (R<sup>2</sup>)</b> |
|------------------|--------------------|------------------------|------------------------------------------------|
| <b>P1</b>        | 739                | 5127                   | 0.27                                           |
| <b>P2</b>        | 3378               | 5313                   | 0.71                                           |
| <b>P3</b>        | 3600               | 6226                   | 0.83                                           |

**Table-S2:** TCSPC data of copolymers.

| Compound    | $\alpha_1$ | $\alpha_2$ | $\alpha_3$ | $\tau_1(\text{ns})$ | $\tau_2(\text{ns})$ | $\tau_3(\text{ns})$ | $\chi^2$    | $\langle\tau\rangle$<br>ns |
|-------------|------------|------------|------------|---------------------|---------------------|---------------------|-------------|----------------------------|
| P1 solution | 47.41      | 34.62      | 17.97      | 0.227077            | 0.074506            | 0.66                | <b>1.19</b> | <b>0.42</b>                |
| P1 film     | 32.31      | 54.76      | 12.93      | 0.360455            | 0.107237            | 1.23733             | <b>1.09</b> | <b>0.74</b>                |
| P2 solution | 63.00      | 37.00      | ----       | 0.400747            | 0.862562            | -----               | <b>1.17</b> | <b>0.66</b>                |
| P2 film     | 64.64      | 35.36      | ----       | 0.342494            | 1.10716             | -----               | <b>1.15</b> | <b>0.83</b>                |
| P3 solution | 39.88      | 60.12      | ----       | 0.281633            | 0.822291            | -----               | <b>1.12</b> | <b>0.73</b>                |
| P3 film     | 28.01      | 71.99      | ----       | 0.6247              | 2.30879             | ----                | <b>1.19</b> | <b>2.14</b>                |

Fluorescence lifetimes were measured through Time-Correlated Single Photon Counting (TCSPC) with Horiba Jobin Yvon Fluoromax 3 spectrometer with magic angle with 405 nm and 450 nm laser probe. The decay curves were fitted with biexponential for **P2** and **P3** solution and film state and P1 in triexponential. The spectra were taken in DCM and spin coated on quartz glass for film state. The average fluorescence lifetimes were measured using the equation-

$$\text{Average fluorescence lifetime, } \langle\tau\rangle = \frac{\sum_i \alpha_i \tau_i^2}{\sum_i \alpha_i \tau_i}$$

, Where 'α' is amplitude percentage and 'τ' is fluorescence lifetimes.

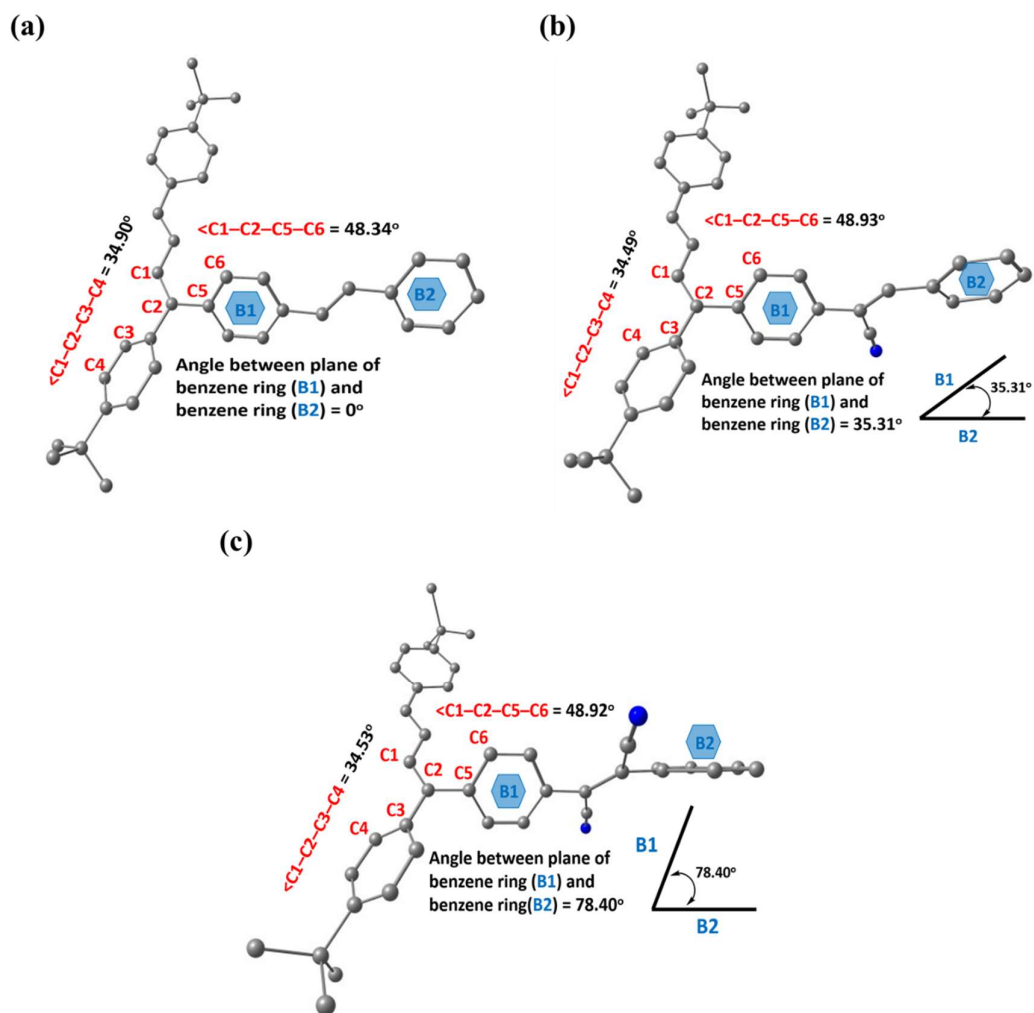

**Fig. S32: Optimized geometry of repeating unit of copolymers (a) P1, (b) (P2) and (P3) showing the twisting angle between planes of two benzene unit of acceptor part of the copolymers**

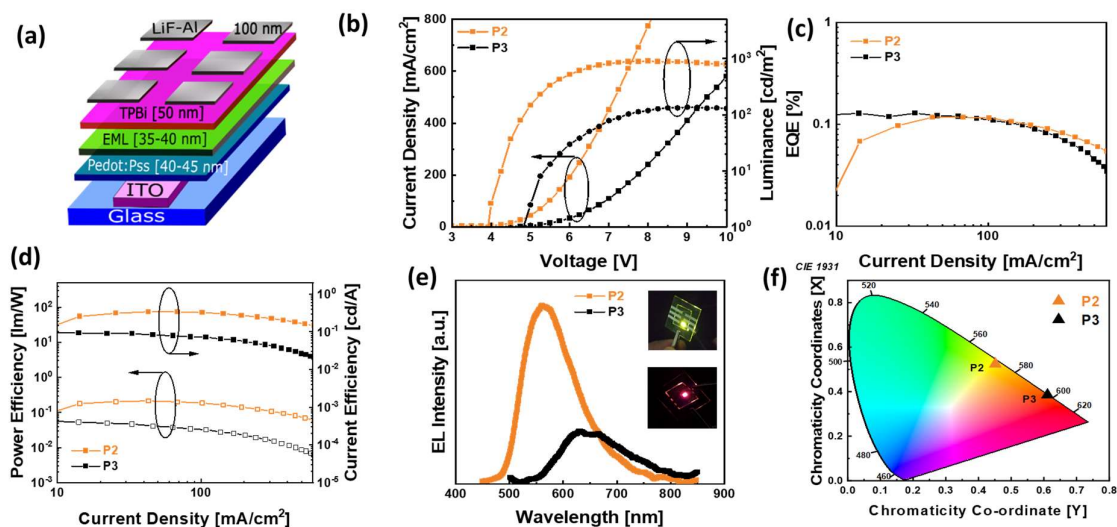

**Fig. S33: Comparative device results of copolymers, P2 and P3** 1(a) shows the device stack used same for P2 and P3 emitters. (b) J-V-L [current Density-Voltage-Luminance] curves. (c) The EQE and Current and (d) Power efficiency vs current density curves. (e) comparison of EL intensity of P2 and P3 (f) CIE color space of EL spectra of P2 and P3.

**Table-S3: Comparative device results.**

| Polymer | Turn On [V]<br>1 cd/m <sup>2</sup> | Luminance [cd/m <sup>2</sup> ]<br>@<br>10/100/1000 | EQE [%]<br>@<br>10/100/1000 | CE [cd/A]<br>@<br>10/100/1000 | PE [lm/W]<br>@<br>10/100/1000 | CIE [X, Y]  |
|---------|------------------------------------|----------------------------------------------------|-----------------------------|-------------------------------|-------------------------------|-------------|
| P2      | 3.9                                | 10/337/891                                         | 0.02/0.11/0.03              | 0.15/0.32/0.15                | 0.11/0.19/0.03                | [0.45,0.51] |
| P3      | 4.8                                | 8/81/-                                             | 0.12/0.09/-                 | 0.09/0.07/-                   | 0.05/0.032/-                  | [0.47,0.27] |



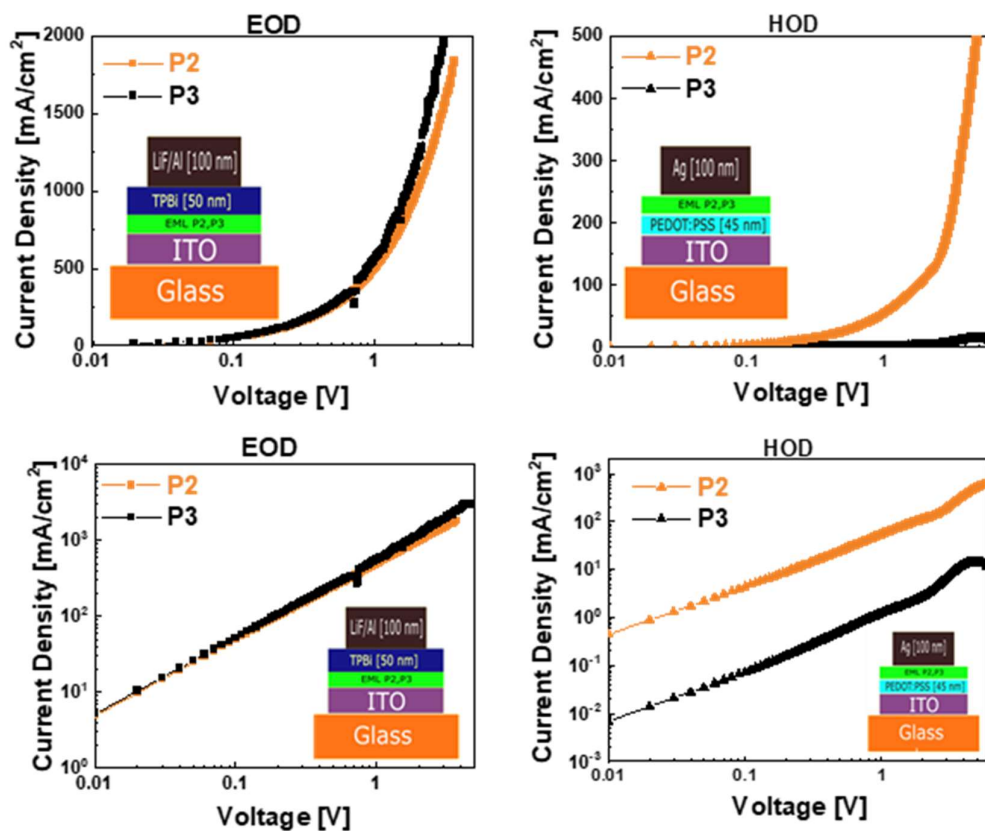

Fig. S34: Comparative I-V characteristics of single carrier transport devices for copolymers (P2 and P3). Electron-only device (EOD) and hole-only device (HOD) made from two copolymers P2 and P3 are showing more or less similar electron mobility and higher hole mobility of copolymer P2 than that of copolymer P3.

**Table-S4:** Solution processed **non-doped PLED** device results.

| Polymer                                                                                               | Device Configuration                                                                                                                                   | Device Result                                                                                                                                                                                                                                                                                                                                                                                                                                                                                                                                                                                                                                                                                                                                                                                                                                                          | Reference                              |                                                            |                            |                                        |                                       |                            |           |                  |                |                               |                 |             |           |      |                  |              |                |                               |            |             |      |             |                |              |                |                                |         |             |           |      |           |              |           |
|-------------------------------------------------------------------------------------------------------|--------------------------------------------------------------------------------------------------------------------------------------------------------|------------------------------------------------------------------------------------------------------------------------------------------------------------------------------------------------------------------------------------------------------------------------------------------------------------------------------------------------------------------------------------------------------------------------------------------------------------------------------------------------------------------------------------------------------------------------------------------------------------------------------------------------------------------------------------------------------------------------------------------------------------------------------------------------------------------------------------------------------------------------|----------------------------------------|------------------------------------------------------------|----------------------------|----------------------------------------|---------------------------------------|----------------------------|-----------|------------------|----------------|-------------------------------|-----------------|-------------|-----------|------|------------------|--------------|----------------|-------------------------------|------------|-------------|------|-------------|----------------|--------------|----------------|--------------------------------|---------|-------------|-----------|------|-----------|--------------|-----------|
| Aryl-substituted buta-1,3-diene based ( <b>P2</b> )                                                   | (ITO)/PEDOT: PSS (40-45 nm)/ <b>Polymer, P2</b> (35-40 nm)/TPBi(50 nm)/LiF(1 nm)/Al(100 nm)                                                            | <table border="1"> <thead> <tr> <th><math>V_{\text{turn-on}}</math> (V)</th> <th><math>L_{\text{max}}</math> (cd/m<sup>2</sup>)</th> <th><math>CE_{\text{max}}</math> (cd/A)</th> <th><math>PE_{\text{max}}</math> (lm/W)</th> <th>EQE (%)</th> </tr> </thead> <tbody> <tr> <td>3.9</td> <td>903</td> <td>0.34</td> <td>0.21</td> <td>0.117</td> </tr> </tbody> </table>                                                                                                                                                                                                                                                                                                                                                                                                                                                                                               | $V_{\text{turn-on}}$ (V)               | $L_{\text{max}}$ (cd/m <sup>2</sup> )                      | $CE_{\text{max}}$ (cd/A)   | $PE_{\text{max}}$ (lm/W)               | EQE (%)                               | 3.9                        | 903       | 0.34             | 0.21           | 0.117                         | <b>Our work</b> |             |           |      |                  |              |                |                               |            |             |      |             |                |              |                |                                |         |             |           |      |           |              |           |
| $V_{\text{turn-on}}$ (V)                                                                              | $L_{\text{max}}$ (cd/m <sup>2</sup> )                                                                                                                  | $CE_{\text{max}}$ (cd/A)                                                                                                                                                                                                                                                                                                                                                                                                                                                                                                                                                                                                                                                                                                                                                                                                                                               | $PE_{\text{max}}$ (lm/W)               | EQE (%)                                                    |                            |                                        |                                       |                            |           |                  |                |                               |                 |             |           |      |                  |              |                |                               |            |             |      |             |                |              |                |                                |         |             |           |      |           |              |           |
| 3.9                                                                                                   | 903                                                                                                                                                    | 0.34                                                                                                                                                                                                                                                                                                                                                                                                                                                                                                                                                                                                                                                                                                                                                                                                                                                                   | 0.21                                   | 0.117                                                      |                            |                                        |                                       |                            |           |                  |                |                               |                 |             |           |      |                  |              |                |                               |            |             |      |             |                |              |                |                                |         |             |           |      |           |              |           |
| Aryl-substituted buta-1,3-diene copolymers ( <b>P1, P2</b> and <b>P3</b> ) with fluorene or carbazole | ITO/ <b>polymer</b> (35 nm)/TPBi (40 nm)/LiF/Al                                                                                                        | <table border="1"> <thead> <tr> <th>Polymer</th> <th><math>\lambda_{\text{ELmax}}</math> (<math>\lambda_{\text{PLmax}}</math>) (nm)</th> <th><math>V_{\text{turn-on}}</math> (V)</th> <th><math>J_{\text{max}}</math> (mA/cm<sup>2</sup>)</th> <th><math>L_{\text{max}}</math> (cd/m<sup>2</sup>)</th> <th><math>\eta_{\text{max}}</math> (cd/A)</th> <th>EQE (%)</th> </tr> </thead> <tbody> <tr> <td><b>P1</b></td> <td>496 (491)</td> <td>12.5</td> <td>109</td> <td>144</td> <td>0.19</td> <td>0.09</td> </tr> <tr> <td><b>P3</b></td> <td>512 (509)</td> <td>8.9</td> <td>242</td> <td>520</td> <td>0.27</td> <td>0.07</td> </tr> <tr> <td><b>P5</b></td> <td>528, 596 (525)</td> <td>11.5</td> <td>200</td> <td>324</td> <td>0.20</td> <td>0.08</td> </tr> </tbody> </table>                                                                                     | Polymer                                | $\lambda_{\text{ELmax}}$ ( $\lambda_{\text{PLmax}}$ ) (nm) | $V_{\text{turn-on}}$ (V)   | $J_{\text{max}}$ (mA/cm <sup>2</sup> ) | $L_{\text{max}}$ (cd/m <sup>2</sup> ) | $\eta_{\text{max}}$ (cd/A) | EQE (%)   | <b>P1</b>        | 496 (491)      | 12.5                          | 109             | 144         | 0.19      | 0.09 | <b>P3</b>        | 512 (509)    | 8.9            | 242                           | 520        | 0.27        | 0.07 | <b>P5</b>   | 528, 596 (525) | 11.5         | 200            | 324                            | 0.20    | 0.08        | <b>S2</b> |      |           |              |           |
| Polymer                                                                                               | $\lambda_{\text{ELmax}}$ ( $\lambda_{\text{PLmax}}$ ) (nm)                                                                                             | $V_{\text{turn-on}}$ (V)                                                                                                                                                                                                                                                                                                                                                                                                                                                                                                                                                                                                                                                                                                                                                                                                                                               | $J_{\text{max}}$ (mA/cm <sup>2</sup> ) | $L_{\text{max}}$ (cd/m <sup>2</sup> )                      | $\eta_{\text{max}}$ (cd/A) | EQE (%)                                |                                       |                            |           |                  |                |                               |                 |             |           |      |                  |              |                |                               |            |             |      |             |                |              |                |                                |         |             |           |      |           |              |           |
| <b>P1</b>                                                                                             | 496 (491)                                                                                                                                              | 12.5                                                                                                                                                                                                                                                                                                                                                                                                                                                                                                                                                                                                                                                                                                                                                                                                                                                                   | 109                                    | 144                                                        | 0.19                       | 0.09                                   |                                       |                            |           |                  |                |                               |                 |             |           |      |                  |              |                |                               |            |             |      |             |                |              |                |                                |         |             |           |      |           |              |           |
| <b>P3</b>                                                                                             | 512 (509)                                                                                                                                              | 8.9                                                                                                                                                                                                                                                                                                                                                                                                                                                                                                                                                                                                                                                                                                                                                                                                                                                                    | 242                                    | 520                                                        | 0.27                       | 0.07                                   |                                       |                            |           |                  |                |                               |                 |             |           |      |                  |              |                |                               |            |             |      |             |                |              |                |                                |         |             |           |      |           |              |           |
| <b>P5</b>                                                                                             | 528, 596 (525)                                                                                                                                         | 11.5                                                                                                                                                                                                                                                                                                                                                                                                                                                                                                                                                                                                                                                                                                                                                                                                                                                                   | 200                                    | 324                                                        | 0.20                       | 0.08                                   |                                       |                            |           |                  |                |                               |                 |             |           |      |                  |              |                |                               |            |             |      |             |                |              |                |                                |         |             |           |      |           |              |           |
| TPE based polymers ( <b>P1, P2, P3</b> and <b>P4</b> )                                                | ITO/PEDOT:PSS (25 nm)/Poly-TPD (25 nm)/EML (32 nm)/TPBi (35 nm)/Cs <sub>2</sub> CO <sub>3</sub> (8 nm):Ag (100 nm)                                     | <table border="1"> <thead> <tr> <th>No.</th> <th><math>\lambda_{\text{EL}}</math> (nm)</th> <th><math>V_{\text{on}}</math> (V)</th> <th>Lumin (L) (cd/m<sup>2</sup>)</th> <th>CD (J) (mA/cm<sup>2</sup>)</th> <th>CE (cd/A)</th> </tr> </thead> <tbody> <tr> <td><b>P1</b></td> <td>494</td> <td>8.7</td> <td>574 (16.8)</td> <td>376</td> <td>0.20</td> </tr> <tr> <td><b>P2</b></td> <td>515</td> <td>6.9</td> <td>1761 (15.0)</td> <td>380</td> <td>0.82</td> </tr> <tr> <td><b>P3</b></td> <td>501</td> <td>5.7</td> <td>3609 (12.9)</td> <td>434</td> <td>1.17</td> </tr> <tr> <td><b>P4</b></td> <td>509</td> <td>4.8</td> <td>3109 (12.6)</td> <td>399</td> <td>1.14</td> </tr> </tbody> </table>                                                                                                                                                               | No.                                    | $\lambda_{\text{EL}}$ (nm)                                 | $V_{\text{on}}$ (V)        | Lumin (L) (cd/m <sup>2</sup> )         | CD (J) (mA/cm <sup>2</sup> )          | CE (cd/A)                  | <b>P1</b> | 494              | 8.7            | 574 (16.8)                    | 376             | 0.20        | <b>P2</b> | 515  | 6.9              | 1761 (15.0)  | 380            | 0.82                          | <b>P3</b>  | 501         | 5.7  | 3609 (12.9) | 434            | 1.17         | <b>P4</b>      | 509                            | 4.8     | 3109 (12.6) | 399       | 1.14 | <b>S3</b> |              |           |
| No.                                                                                                   | $\lambda_{\text{EL}}$ (nm)                                                                                                                             | $V_{\text{on}}$ (V)                                                                                                                                                                                                                                                                                                                                                                                                                                                                                                                                                                                                                                                                                                                                                                                                                                                    | Lumin (L) (cd/m <sup>2</sup> )         | CD (J) (mA/cm <sup>2</sup> )                               | CE (cd/A)                  |                                        |                                       |                            |           |                  |                |                               |                 |             |           |      |                  |              |                |                               |            |             |      |             |                |              |                |                                |         |             |           |      |           |              |           |
| <b>P1</b>                                                                                             | 494                                                                                                                                                    | 8.7                                                                                                                                                                                                                                                                                                                                                                                                                                                                                                                                                                                                                                                                                                                                                                                                                                                                    | 574 (16.8)                             | 376                                                        | 0.20                       |                                        |                                       |                            |           |                  |                |                               |                 |             |           |      |                  |              |                |                               |            |             |      |             |                |              |                |                                |         |             |           |      |           |              |           |
| <b>P2</b>                                                                                             | 515                                                                                                                                                    | 6.9                                                                                                                                                                                                                                                                                                                                                                                                                                                                                                                                                                                                                                                                                                                                                                                                                                                                    | 1761 (15.0)                            | 380                                                        | 0.82                       |                                        |                                       |                            |           |                  |                |                               |                 |             |           |      |                  |              |                |                               |            |             |      |             |                |              |                |                                |         |             |           |      |           |              |           |
| <b>P3</b>                                                                                             | 501                                                                                                                                                    | 5.7                                                                                                                                                                                                                                                                                                                                                                                                                                                                                                                                                                                                                                                                                                                                                                                                                                                                    | 3609 (12.9)                            | 434                                                        | 1.17                       |                                        |                                       |                            |           |                  |                |                               |                 |             |           |      |                  |              |                |                               |            |             |      |             |                |              |                |                                |         |             |           |      |           |              |           |
| <b>P4</b>                                                                                             | 509                                                                                                                                                    | 4.8                                                                                                                                                                                                                                                                                                                                                                                                                                                                                                                                                                                                                                                                                                                                                                                                                                                                    | 3109 (12.6)                            | 399                                                        | 1.14                       |                                        |                                       |                            |           |                  |                |                               |                 |             |           |      |                  |              |                |                               |            |             |      |             |                |              |                |                                |         |             |           |      |           |              |           |
| TPE based linear and hyperbranched polymers ( <b>HP-TPE-Cz</b> and <b>LP-TPE-Cz</b> )                 | (ITO)/PEDOT:PSS (25 nm)/Poly-TPD (25 nm)/ <b>HP-TPE-Cz</b> or <b>LP-TPE-Cz</b> (32 nm)/TPBi (35 nm)/Cs <sub>2</sub> CO <sub>3</sub> (8 nm):Ag (100 nm) | <table border="1"> <thead> <tr> <th>Polymer</th> <th><math>\lambda_{\text{EL}}</math> (nm)</th> <th><math>V_{\text{turn-on}}</math> (V)</th> <th><math>CE_{\text{max}}</math> (cd/A)</th> <th><math>L_{\text{max}}</math> (cd/m<sup>2</sup>)</th> <th>CD (mA/cm)</th> <th>EQE (%)</th> </tr> </thead> <tbody> <tr> <td><b>HP-TPE-Cz</b></td> <td>508</td> <td>5.2</td> <td>2.13</td> <td>5914(14.4)</td> <td>448</td> <td>0.09</td> </tr> <tr> <td><b>LP-TPE-Cz</b></td> <td>500</td> <td>8.0</td> <td>1.04</td> <td>1654(16.2)</td> <td>393</td> <td>0.07</td> </tr> </tbody> </table>                                                                                                                                                                                                                                                                                | Polymer                                | $\lambda_{\text{EL}}$ (nm)                                 | $V_{\text{turn-on}}$ (V)   | $CE_{\text{max}}$ (cd/A)               | $L_{\text{max}}$ (cd/m <sup>2</sup> ) | CD (mA/cm)                 | EQE (%)   | <b>HP-TPE-Cz</b> | 508            | 5.2                           | 2.13            | 5914(14.4)  | 448       | 0.09 | <b>LP-TPE-Cz</b> | 500          | 8.0            | 1.04                          | 1654(16.2) | 393         | 0.07 | <b>S4</b>   |                |              |                |                                |         |             |           |      |           |              |           |
| Polymer                                                                                               | $\lambda_{\text{EL}}$ (nm)                                                                                                                             | $V_{\text{turn-on}}$ (V)                                                                                                                                                                                                                                                                                                                                                                                                                                                                                                                                                                                                                                                                                                                                                                                                                                               | $CE_{\text{max}}$ (cd/A)               | $L_{\text{max}}$ (cd/m <sup>2</sup> )                      | CD (mA/cm)                 | EQE (%)                                |                                       |                            |           |                  |                |                               |                 |             |           |      |                  |              |                |                               |            |             |      |             |                |              |                |                                |         |             |           |      |           |              |           |
| <b>HP-TPE-Cz</b>                                                                                      | 508                                                                                                                                                    | 5.2                                                                                                                                                                                                                                                                                                                                                                                                                                                                                                                                                                                                                                                                                                                                                                                                                                                                    | 2.13                                   | 5914(14.4)                                                 | 448                        | 0.09                                   |                                       |                            |           |                  |                |                               |                 |             |           |      |                  |              |                |                               |            |             |      |             |                |              |                |                                |         |             |           |      |           |              |           |
| <b>LP-TPE-Cz</b>                                                                                      | 500                                                                                                                                                    | 8.0                                                                                                                                                                                                                                                                                                                                                                                                                                                                                                                                                                                                                                                                                                                                                                                                                                                                    | 1.04                                   | 1654(16.2)                                                 | 393                        | 0.07                                   |                                       |                            |           |                  |                |                               |                 |             |           |      |                  |              |                |                               |            |             |      |             |                |              |                |                                |         |             |           |      |           |              |           |
| TPE based organic-inorganic hydride hyper-Branched polymer ( <b>PFTPE-Ir(piq)<sub>3</sub>-X</b> )     | ITO/PEDOT:PSS (40 nm)/PFBT-Ir(piq) <sub>3</sub> (80 nm)/TPBi (40 nm)/LiF (1 nm)/Al (100 nm)                                                            | <table border="1"> <thead> <tr> <th>Device</th> <th>Emission layer</th> <th><math>\lambda_{\text{EL}}</math> (nm)</th> <th>Luminance max (cd/m<sup>2</sup>)</th> <th><math>CE_{\text{max}}</math> (cd/A)</th> <th><math>EQE_{\text{max}}</math> (%)</th> <th>CRI</th> <th>CIE(x, y)</th> </tr> </thead> <tbody> <tr> <td><b>WOLED-1</b></td> <td>PFTPE-Ir(piq)<sub>3</sub>-1</td> <td>492/632</td> <td><b>4067</b></td> <td>2.24</td> <td>0.91</td> <td>71</td> <td>(0.25, 0.36)</td> </tr> <tr> <td><b>WOLED-2</b></td> <td>PFTPE-Ir(piq)<sub>3</sub>-5</td> <td>496/636</td> <td><b>4686</b></td> <td>2.43</td> <td>1.08</td> <td>86</td> <td>(0.26, 0.36)</td> </tr> <tr> <td><b>WOLED-3</b></td> <td>PFTPE-Ir(piq)<sub>3</sub>-10</td> <td>492/640</td> <td><b>2277</b></td> <td>1.76</td> <td>1.05</td> <td>71</td> <td>(0.33, 0.34)</td> </tr> </tbody> </table> | Device                                 | Emission layer                                             | $\lambda_{\text{EL}}$ (nm) | Luminance max (cd/m <sup>2</sup> )     | $CE_{\text{max}}$ (cd/A)              | $EQE_{\text{max}}$ (%)     | CRI       | CIE(x, y)        | <b>WOLED-1</b> | PFTPE-Ir(piq) <sub>3</sub> -1 | 492/632         | <b>4067</b> | 2.24      | 0.91 | 71               | (0.25, 0.36) | <b>WOLED-2</b> | PFTPE-Ir(piq) <sub>3</sub> -5 | 496/636    | <b>4686</b> | 2.43 | 1.08        | 86             | (0.26, 0.36) | <b>WOLED-3</b> | PFTPE-Ir(piq) <sub>3</sub> -10 | 492/640 | <b>2277</b> | 1.76      | 1.05 | 71        | (0.33, 0.34) | <b>S5</b> |
| Device                                                                                                | Emission layer                                                                                                                                         | $\lambda_{\text{EL}}$ (nm)                                                                                                                                                                                                                                                                                                                                                                                                                                                                                                                                                                                                                                                                                                                                                                                                                                             | Luminance max (cd/m <sup>2</sup> )     | $CE_{\text{max}}$ (cd/A)                                   | $EQE_{\text{max}}$ (%)     | CRI                                    | CIE(x, y)                             |                            |           |                  |                |                               |                 |             |           |      |                  |              |                |                               |            |             |      |             |                |              |                |                                |         |             |           |      |           |              |           |
| <b>WOLED-1</b>                                                                                        | PFTPE-Ir(piq) <sub>3</sub> -1                                                                                                                          | 492/632                                                                                                                                                                                                                                                                                                                                                                                                                                                                                                                                                                                                                                                                                                                                                                                                                                                                | <b>4067</b>                            | 2.24                                                       | 0.91                       | 71                                     | (0.25, 0.36)                          |                            |           |                  |                |                               |                 |             |           |      |                  |              |                |                               |            |             |      |             |                |              |                |                                |         |             |           |      |           |              |           |
| <b>WOLED-2</b>                                                                                        | PFTPE-Ir(piq) <sub>3</sub> -5                                                                                                                          | 496/636                                                                                                                                                                                                                                                                                                                                                                                                                                                                                                                                                                                                                                                                                                                                                                                                                                                                | <b>4686</b>                            | 2.43                                                       | 1.08                       | 86                                     | (0.26, 0.36)                          |                            |           |                  |                |                               |                 |             |           |      |                  |              |                |                               |            |             |      |             |                |              |                |                                |         |             |           |      |           |              |           |
| <b>WOLED-3</b>                                                                                        | PFTPE-Ir(piq) <sub>3</sub> -10                                                                                                                         | 492/640                                                                                                                                                                                                                                                                                                                                                                                                                                                                                                                                                                                                                                                                                                                                                                                                                                                                | <b>2277</b>                            | 1.76                                                       | 1.05                       | 71                                     | (0.33, 0.34)                          |                            |           |                  |                |                               |                 |             |           |      |                  |              |                |                               |            |             |      |             |                |              |                |                                |         |             |           |      |           |              |           |

Reference:

- S1.** M. Nakamura, M. Gon, K. Tanaka and Y. Chujo, *Macromolecules* 2023, **56**, 2709–2718.  
**S2.** Y. Liu, X. Chen, J. Qin, G. Yu and Y. Liu, *Polymer*, 2010, **51**, 3730-3735.  
**S3.** W. Wu, S. Ye, R. Tang, L. Huang, Q. Li, G. Yu, Y. Liu, J. Qin and Z. Li, *Polymer*, 2012, **53**, 3163-3171.  
**S4.** W. Wu, S. Ye, L. Huang, L. Xiao, Y. Fu, Q. Huang, G. Yu, Y. Liu, J. Qin, Q. Lia and Z. Li, *J. Mater. Chem.*, 2012, **22**, 6374-6382.  
**S5.** D. Wu, T. Zhang, J. Sun, Y. Wu, X. Liao, G. Lu, J. Yang, H. Wang, L. Li and B. Xu, *Tetrahedron*, 2018, **74**, 7218-7227.
